1 **Mechanistic basis for decreased antimicrobial susceptibility in a clinical isolate of *Neisseria gonorrhoeae***  
2 **possessing a mosaic-like *mtr* efflux pump locus**

3  
4 Corinne E. Rouquette-Loughlin<sup>1</sup>, Jennifer L. Reimche<sup>1</sup>, Jacqueline T. Balthazar<sup>1</sup>, Vijaya Dhulipala<sup>1</sup>, Kim M.  
5 Gernert<sup>2</sup>, Ellen N. Kersh<sup>2</sup>, Cau D. Pham<sup>2</sup>, Kevin Pettus<sup>2</sup>, A. Jeanine Abrams<sup>2</sup>, David L. Trees<sup>2</sup>, Sancta St Cyr<sup>2</sup>,  
6 and William M. Shafer<sup>1,3,4\*</sup>

7  
8 <sup>1</sup>Department of Microbiology and Immunology, Emory University School of Medicine, Atlanta, GA 30322

9 <sup>2</sup>Division of STD Prevention, National Center for HIV/AIDS, Viral Hepatitis, STD, and TB Prevention, Centers  
10 for Disease Control and Prevention, U.S. Department of Health and Human Services, Atlanta, Georgia, 30329

11 <sup>3</sup>The Emory Antibiotic Resistance Center, Emory University School of Medicine, Atlanta, GA 30322

12 <sup>4</sup>Laboratories of Bacterial Pathogenesis, Veterans Affairs Medical Center, Decatur, GA 30033

13  
14 **Running title:** Mechanisms of mosaic-like *mtr* sequences and gonococcal antimicrobial resistance

15  
16 **\*Corresponding author:** email: [wshafer@emory.edu](mailto:wshafer@emory.edu); phone: 404-805-1822

17

## 18 **ABSTRACT**

19 Recent reports suggest that mosaic-like sequences within the *mtr* (*multiple transferable resistance*) efflux pump  
20 locus of *Neisseria gonorrhoeae* likely originating from commensal *Neisseria sp.* by transformation can increase  
21 the ability of gonococci to resist structurally diverse antimicrobials. Thus, acquisition of numerous nucleotide  
22 changes within the *mtrR* gene encoding the transcriptional repressor (MtrR) of the *mtrCDE* efflux pump-  
23 encoding operon or overlapping promoter region for both along with those that cause amino acid changes in the  
24 MtrD transporter protein were recently reported to decrease gonococcal susceptibility to numerous  
25 antimicrobials, including azithromycin (Azi) (Wadsworth *et al.* 2018. MBio. doi.org/10.1128/mBio.01419-  
26 18). We performed detailed genetic and molecular studies to define the mechanistic basis for why such strains  
27 can exhibit decreased susceptibility to MtrCDE antimicrobial substrates including Azi. We report that a strong  
28 *cis*-acting transcriptional impact of a single nucleotide change within the -35 hexamer of the *mtrCDE* promoter  
29 as well gain-of-function amino acid changes at the C-terminal region of MtrD can mechanistically account for  
30 the decreased antimicrobial susceptibility of gonococci with a mosaic-like *mtr* locus.

## 31 **IMPORTANCE (99 words)**

32 Historically, after introduction of an antibiotic for treatment of gonorrhea, strains of *N. gonorrhoeae* emerge  
33 that display clinical resistance due to spontaneous mutation or acquisition of resistance genes. Genetic  
34 exchange between members of the *Neisseria* genus occurring by transformation can cause significant changes in  
35 gonococci that impact the structure of an antibiotic target or expression of genes involved in resistance. The  
36 results presented herein provide a framework for understanding how mosaic-like DNA sequences from  
37 commensal *Neisseria* that recombine within the gonococcal *mtr* efflux pump locus function to decrease  
38 bacterial susceptibility to antimicrobials including antibiotics used in therapy of gonorrhea.

## 39 **INTRODUCTION**

40 *Neisseria gonorrhoeae* is the etiologic agent of the sexually transmitted infection (STI) gonorrhea.  
41 Gonorrhea is the second most reported condition in the USA (468,514 cases were reported in 2016) (1) and a  
42 major worldwide public health problem given its estimated yearly incidence of 78 million of infections (2).

43 Historically, the gonococcus has developed resistance to all drugs used for treatment since the introduction of  
44 sulfonamides in the late 1930s (3) and concern exists that without new effective antibiotics some gonorrheal  
45 infections in the future may be untreatable (4, 5). Currently, a dual antibiotic treatment regimen of ceftriaxone  
46 (Cro) (single intramuscular injection of 250-500 mg) and azithromycin (Azi) (single oral dose of 1-2 g dose) is  
47 used in many western countries (6, 7), but their continued efficacy for use in curing gonorrheal infections is  
48 threatened as strains resistant to either or both antibiotics have emerged in the past decade (8-11).

49 The gonococcus has adapted numerous strategies to survive attacks by antimicrobials, including the use  
50 of multidrug efflux pumps to export toxic compounds (3, 12, 13). Five gonococcal efflux pumps that export a  
51 wide range of substrates have been described (13). Of these, the best studied efflux pump is MtrCDE, which  
52 belongs to the resistance-nodulation-division family possessed by many Gram-negative bacteria. MtrCDE  
53 captures and exports structurally diverse, but generally amphipathic, antimicrobial agents including macrolides,  
54 beta-lactams, cationic antimicrobial peptides, dyes and detergents (13). The contribution of the MtrCDE efflux  
55 pump in antimicrobial resistance expressed by gonococci can be enhanced by *cis*- or *trans*-acting mutations that  
56 result in over-expression of the *mtrCDE* efflux pump operon (13). Importantly, over-production of the MtrCDE  
57 efflux pump due to relief of transcriptional repression of *mtrCDE* can contribute to clinically relevant levels of  
58 resistance to beta-lactams and macrolides (13).

59 Expression of *mtrCDE* in wild-type (WT) gonococci is subject to repression by MtrR (14, 15) and, in  
60 the presence of an inducer, activation by MtrA (16). Both MtrA and MtrR bind to regions within a 250 bp  
61 sequence that contains overlapping, divergent promoters for *mtrR* and *mtrCDE* transcription (17). Loss of MtrR  
62 repression of *mtrCDE* can result from point mutations in the MtrR-binding site (14), a single base pair (bp)  
63 deletion within a 13 bp inverted repeat sequence in the *mtrR* promoter (18), a point mutation that creates a new  
64 *mtrCDE* promoter (19) or missense/nonsense mutations in the *mtrR* gene (20-22). In addition to decreasing  
65 gonococcal susceptibility to antibiotics, these regulatory mutations can also enhance the fitness of gonococci  
66 during experimental infection of the lower genital tract of female mice (23), which supports the concept that the

67 MtrCDE efflux pump is of importance during infection due to its ability to export host-derived antimicrobials  
68 such as cationic antimicrobial peptides and progesterone (24).

69 While single site regulatory mutations impacting *mtrCDE* expression have been extensively studied (14,  
70 19-22, 29), increasing evidence suggests that entry and recombination of donor DNA from commensal  
71 *Neisseria spp.* into the *mtr* locus can result in multiple nucleotide changes that can decrease gonococcal  
72 susceptibility to antimicrobials including Azi and Cro. Thus, the presence of mosaic-like sequences within the  
73 *mtrR* region likely resulting from transformation by DNA from *N. lactamica* or *N. meningitidis* has been  
74 reported in worldwide-isolated gonococcal strains (25-28, 30). Recent work by Wadsworth *et al.* (30) showed  
75 that gonococci bearing diverse mosaic-like sequences within the *mtrR/mtrCDE* promoter region have elevated  
76 expression of *mtr*-associated genes and decreased susceptibility to Azi. Importantly, mosaic-like sequences  
77 within the *mtrD* inner membrane transporter protein-encoding gene showed strong linkage disequilibrium and  
78 epistatic effects that likely enhance the activity of the MtrCDE efflux pump (30). Taken together, the available  
79 information strongly suggest that mosaic-like sequences in the *mtr* locus can result in increased expression of  
80 the *mtrCDE* efflux pump operon as well as providing a gain-of-function property to MtrD that enhances its  
81 ability to export antimicrobials. In this study, we examined gonococcal clinical isolates that possess a mosaic-  
82 like *mtr* locus similar to other clinical isolates (30). We describe both a single nucleotide change in the  
83 overlapping *mtrR/mtrCDE* promoters and a likely mechanism for its impact on gene transcription, and amino  
84 acid changes in the C-terminal domain of MtrD that were linked to the decreased antimicrobial susceptibility  
85 phenotype expressed by gonococci with a mosaic-like *mtr* locus.

86

## 87 RESULTS

88 **Importance of the MtrCDE efflux pump in reduced susceptibility to Azi and other antimicrobials**  
89 **in gonococcal clinical isolates bearing a mosaic-like *mtr* locus.** Public health laboratories associated with the  
90 Gonococcal Isolate Surveillance Project (GISP) alert the Centers for Disease Control and Prevention (CDC) to  
91 *N. gonorrhoeae* isolates if the Azi minimal inhibitory concentration (MIC) is 2 µg/ml or greater. High-level  
92 MICs to Azi ( $\geq 256$  µg/ml [3]) is typically due to mutations in the four 23S ribosomal RNA (*rRNA*) genes (31).  
93 However, in recent years it has become apparent that gonococci can display a so-called “less Azi-susceptible”  
94 phenotype characterized by MIC values of 2-4 µg/ml (3, 25-30) that does not involve 23S *rRNA* mutations.  
95 This less Azi-susceptible property may help gonococci escape the action of this macrolide during treatment,  
96 especially at extra-genital sites of infection (e.g., the pharyngeal mucosa) where the pharmacokinetic properties  
97 of antibiotics are not optimal (32). It is therefore important to define how gonococci can develop decreased  
98 Azi-susceptibility in the absence of 23S *rRNA* mutations as this could result in clinical failure of this macrolide  
99 during certain infections.

100 In order to study emergence of gonococcal clinical isolates with reduced susceptibility to Azi and to  
101 ascertain the contribution, if any, of the MtrCDE efflux pump system to this phenotype, we analyzed eight  
102 clinical strains collected in 2014 that expressed a less Azi-susceptible property (MIC of 2 µg/ml); details of  
103 these strains are provided in Materials and Methods and Table S1. Whole genome sequencing (WGS)  
104 performed on these eight strains and detailed bioinformatic analysis revealed that they lacked known 23S *rRNA*  
105 mutations associated with high levels of Azi resistance (data not presented). The sequence of the genes within  
106 the *mtr* locus of the 8 strains were identical, and they contained multiple nucleotide differences compared to  
107 antibiotic-sensitive reference strain FA19; the details of the WGS performed on these and other strains will be  
108 presented elsewhere (Soge and McLean, in preparation). Briefly, an alignment of the nucleotide sequence of  
109 the entire *mtr* locus in clinical strain LRRBGS0002 (hereafter termed CDC2), displaying a less Azi-susceptible  
110 phenotype with that of FA19 is shown in Fig. S1A. The nucleotide sequence of the *mtr* locus possessed by  
111 strain CDC2 was most dissimilar to FA19 (as well as three other gonococcal strains [MS11, FA1090 and

112 H041]) in the *mtrR/mtrCDE* promoter region, the *mtrD* gene and the non-coding region between *mtrD* and *mtrE*  
113 (Fig. 1). A BLAST search against *Neisseria* (taxid: 482) nucleotide sequences in NCBI ([blast.ncbi.nlm.nih.gov](http://blast.ncbi.nlm.nih.gov))  
114 determined that the entire *mtr* locus sequence possessed by CDC2 was most similar (95% identity) to that of *N.*  
115 *polysaccharea* M18661 (GenBank: CP031325.1). Analysis of a phylogenetic tree based on the *mtr* loci of  
116 CDC2, FA19, and three clinical strains (GCGS0276, GCGS0402, and GCGS0834) with mosaic-like *mtr* loci  
117 studied by Wadsworth *et al.* (30), indicated that at the *mtr* locus CDC2 was most similar to that possessed by  
118 strain GCGS0402 (Fig. S1B). In fact, the nucleotide sequence of the *mtr* locus of CDC2 and GCGS0402 was  
119 identical. Importantly, however, CDC2 lacked the Correia element (CE) (33) that is positioned adjacent to the  
120 *mtrR-mtrCDE* promoter region found in *mtr* mosaic-like strain GCGS0276 (30) (Fig. S1A).

121 Since CDC2 contained numerous nucleotide sequence variations (with respect to FA19) in the *mtrR*  
122 coding region and the overlapping *mtrR/mtrCDE* promoter region, we hypothesized that it (as well as the seven  
123 other alert strains) might over-produce the MtrCDE pump leading to decreased susceptibility to Azi and other  
124 antimicrobials. In order to confirm that this efflux pump is required for antimicrobial resistance in CDC2, as it  
125 has been reported for non-*mtr* mosaic-like clinical isolates such as H041 (29), we created a mutant that lacked a  
126 functional MtrCDE efflux pump due to insertional inactivation (*mtrD::kan*) of the parental *mtrD* gene, which  
127 encodes the MtrD cytoplasmic membrane transporter. We also created other mutants that lacked functional  
128 MacAB or NorM efflux pumps to ascertain if their loss might also increase susceptibility of this strain to  
129 antimicrobials. Of these three efflux pumps, only loss of an active MtrCDE efflux pump rendered CDC2 and  
130 the other Azi alert isolates hyper-susceptible to Azi (Table S1). Similarly, for CDC2 (Table 1) and the other  
131 Azi alert strains (data not presented), only the loss of the MtrCDE efflux pump (see CR.99 in Tables S1 and S2)  
132 resulted in hyper-susceptibility to the tested antimicrobials.

133 Since the MtrCDE efflux pump was essential for cross-resistance of CDC2 to antimicrobials, we  
134 focused on defining the impact of mosaic-like sequences in its *mtr* locus on MIC values of antimicrobials  
135 exported by this pump. For this purpose, we studied expression of the *mtrR* repressor gene and *mtrE* gene,  
136 which encodes the outer membrane protein (OMP) channel of the pump and is the last gene in the *mtrCDE*

137 operon (Fig. 1 and ref. 3). Expression of these genes in FA19 and CDC2 was assessed at the levels of  
138 transcription and translation by qRT-PCR and western immunoblotting, respectively. At the level of  
139 transcription, it was found that *mtrR* expression in FA19 was significantly higher than that of CDC2, while  
140 *mtrE* expression was higher in CDC2 (Figure 2A). With respect to the MtrR repressor protein, its level in  
141 CDC2 and the other seven clinical Azi-alert strains was substantially less than that of strain FA19 (Figure S2A).  
142 As expected by the low level of the MtrR repressor in CDC2, the level of the MtrE OMP in this strain was  
143 higher than that of FA19. In this respect, the level of MtrE in CDC2 was similar to that of strain JF1  
144 (FA19 $\Delta$ *mtrR*), but less than that of KH15 (FA19 with single bp deletion in the *mtrR* promoter, which is known  
145 to decrease *mtrR* expression and increase *mtrCDE* expression (Fig. S2B).

146 **Increased expression of *mtrCDE* due to mosaic-like *mtrR* and *mtrR-mtrCDE* promoter regions can**  
147 **contribute to, but is not sufficient, for the decreased Azi susceptibility phenotype of CDC2.** We  
148 hypothesized that the less Azi-susceptible phenotype of CDC2 was due, in part, to enhanced levels of the  
149 MtrCDE efflux pump resulting from *cis*- and/or *trans*-acting mutations generated by the mosaic-like sequence  
150 that influence *mtrR* and *mtrCDE* expression. To test this hypothesis, we replaced the FA19 *mtrR* coding and  
151 *mtrR-mtrCDE* promoter sequences with that possessed by CDC2 and tested if this would influence expression  
152 of these genes as well as increasing MICs of Azi and other antimicrobials recognized by the MtrCDE efflux  
153 pump. For this purpose, a PCR-generated DNA fragment containing the *mtrR* coding region, the *mtrR-mtrCDE*  
154 intervening region and the 5'-end of *mtrC* present in CDC2 (summarized in Fig. 3A) was used to transform  
155 strain FA19 for increased resistance to a known MtrCDE substrate, triton X-100 (TX-100). A resulting  
156 transformant termed CR.100 (Tables 1 and 2) was selected for more detailed studies. DNA sequencing revealed  
157 that CR.100 had *mtrR* coding and *mtrR-mtrCDE* promoter sequences that contained most, but not all, of the  
158 CDC2 donor mosaic-like DNA in this region (Fig. 3A). With respect to the nucleotide changes in the non-  
159 coding sequence, CR.100 had the CDC2 mosaic-like sequence that included one nucleotide change within the -  
160 35 hexamer of the *mtrR* promoter (C to T) and one change within the -35 hexamer of the *mtrCDE* promoter (T  
161 to G) (Fig. 3A and Table 2) that have been observed in other strains (26, 30). In this respect, Wadsworth *et al*



162 found that the -35 *mtrR* promoter mutation was (present in GCGS0402, while the -35 *mtrCDE* promoter  
163 mutation was present in all three of the *mtr* mosaic-like strains used in their study (30). Although a nucleotide  
164 difference was also noted in the previously identified transcriptional start site (TSS) for *mtrCDE* transcription  
165 (18), primer extension analysis revealed that transcription of *mtrCDE* in strains CDC2 and FA19 was similarly  
166 initiated (Fig. S3). CR.100 also contained the CDC2-derived mosaic-like sequence in *mtrR*, which was  
167 characterized by missense mutations in codons 79 (D79N), 183 (S183N) and 197 (M197I) (Fig. 3B).

168 As is shown in Table 1, transformant strain CR.100 was more resistant than parent strain FA19 to a  
169 panel of MtrCDE substrate antimicrobials, but was two-fold less resistant than donor strain CDC2 to macrolides  
170 Azi and Ery and 4-fold less resistant to ethidium bromide (EB). An examination of transcript levels of *mtrR*  
171 and *mtrE* in FA19 vs. CR.100 showed that *mtrR* expression was decreased in CR.100 while *mtrE* expression  
172 was increased (Figure 2B). Although the MtrR repressor protein was readily detected in whole cell lysates of  
173 FA19, it was much lower in transformant strain CR.100 (Fig. 4). This result indicated that acquisition of the  
174 mosaic-like sequence encompassing the *mtrR* coding and *mtrR-mtrCDE* promoter sequences resulted in  
175 transcriptional repression of *mtrR* and de-repression of *mtrCDE*. However, it was unclear as to whether these  
176 gene expression differences and increased MICs of antimicrobials were due to the *mtrR*-coding or promoter  
177 mutations present in CR.100.

178 In order to separate potential influences of *cis*- or *trans*-acting mutations in the overlapping  
179 *mtrR/mtrCDE* promoter regions with that of the *mtrR* coding region, respectively, on levels of antimicrobial  
180 resistance and gene expression in CR.100, we generated a pair of PCR products that singularly covered these  
181 regions in CDC2. We found that both regions could transform WT strain FA19 for decreased susceptibility to  
182 TX-100 or Azi. Recovered transformants were termed CR.101 and CR.102. DNA sequencing of PCR products  
183 from CR.101 and CR.102 was performed to determine the extent of recombination of the donor mosaic-like  
184 sequence in the *mtrR* coding or upstream non-coding region. With the promoter region-bearing PCR product,  
185 we found that complete replacement of the wild-type *mtrR-mtrCDE* intervening region by the donor sequence  
186 from CR.100 had occurred in CR.101 (Table 2 and Fig. 3A). In contrast, with the *mtrR* coding PCR product,



187 only the MtrR D79N mutation was present in CR.102; the MtrR amino acid alignment information is provided  
188 in Fig. 3B and summarized in Table 2. Antimicrobial susceptibility testing results (Table 1) showed that the  
189 MICs of macrolides against CR.101 (mosaic-like *mtrR-mtrCDE* intervening region) was two-fold higher than  
190 that of CR.102 (MtrR D79N). Interestingly, TX-100 resistance was > 32-fold higher in CR.101 than CR.102  
191 (MtrR D79N); the MIC against CR.101 resembled that seen with KH15 (Table 1) which has a single bp deletion  
192 in the *mtrR* promoter that abrogates *mtrR* gene expression and shifts RNA polymerase recognition to the  
193 *mtrCDE* promoter (15). In contrast, the TX-100 MIC versus CR.102 was similar to that of JF1 (Table 1), which  
194 has a deletion of *mtrR* but retains a wild-type *mtrR* promoter (34).

195 The results from antimicrobial susceptibility testing suggested that *mtrR* coding and non-coding mosaic-  
196 like sequences have different impacts on expression of *mtr*-associated genes. Indeed, we found that while the  
197 MtrR D79N mutation in CR.102, which is also possessed by GCGS0402 and GCGS0834 (30), resulted in  
198 increased levels of *mtrE* expression compared to parental strain FA19 it also, unlike CDC2 and CR.100, had  
199 increased levels of the *mtrR* transcript (Fig. 2D) and the MtrR repressor protein (Fig. 4). Although position 79  
200 of MtrR is outside of the DNA-binding domain of this repressor (14, 15), we suggest that this amino acid  
201 change causes a decrease in MtrR function resulting in de-repression of *mtrCDE* expression. Nevertheless, the  
202 consequence of this mutation did not endow gonococci with either the antimicrobial resistance profile or the  
203 *mtrR* gene expression profile observed for CDC2 or CR.100 that also have *mtrR/mtrCDE* promoter mutations  
204 (Table 1 and Fig. 2).

205 Based on the findings with CR.102, we next tested whether potentially *cis*-acting mutations in the *mtrR*-  
206 *mtrCDE* promoter region influence expression of *mtrR* or *mtrCDE*. As was observed with clinical isolate  
207 CDC2 and transformant strain CR.100, the presence of the mosaic-like *mtrR-mtrCDE* promoter region in  
208 CR.101 resulted in a decreased level of *mtrR* expression, but increased amounts of the *mtrE* transcript compared  
209 to parental strain FA19 (Fig. 2C). We hypothesize that mutations upstream of *mtrR*, especially the single  
210 nucleotide changes in the adjacent -35 hexamers of the *mtrR* and *mtrCDE* promoters (Fig. 3A), negatively  
211 impact expression of *mtrR* expression. Such repression of *mtrR* would not occur in CR.102 (MtrR D79N)

where the wild-type FA19 promoter sequence is present (Fig. 3A) and MtrR levels are elevated (Fig. 4). Coupled with the antimicrobial susceptibility data (Tables 1 and 2), this result indicated that the nucleotide changes in the promoter region were responsible for modulating expression of *mtrR* and *mtrCDE* in clinical isolate CDC2 and transformant strain CR.100.

**A single nucleotide change in the mosaic-like *mtrR/mtrCDE* promoter region can impact gene expression.** We hypothesized that the T to G change in the -35 hexamer region of the *mtrCDE* sigma-70 promoter in clinical isolate CDC2 and FA19 transformant strains CR.100 and CR.101 (red arrow, Figure 3A) directly raised *mtrCDE* expression (Figure 2A) and the MICs of MtrCDE antimicrobial substrates (Table 1); a similar nucleotide change was observed by others in *mtr* mosaic-like strains (26, 30). This nucleotide change would result in an improved -35 hexamer (5'-TTTTTAT-3' to 5'-TTGTTAT-3') of the *mtrCDE* promoter. To test the importance of this T to G change, two pLES94 *mtrCpromoter-lacZ* fusion ( $P_{mtrC-lacZ}$ ) constructs containing either the CDC2 *mtrCDE* promoter (CR.102pLES2.2) or an identical sequence but with the T nucleotide (CR.102pLES4.1) were introduced into CR.102 (FA19 MtrR D79N) by transformation; the *lacZ* fusions integrated in the *proAB* region of the gonococcal chromosome (35). After verification of selected transformants by DNA sequencing of PCR products, levels of beta-galactosidase ( $\beta$ -gal) were measured. As is shown in Fig. 5, the  $\beta$ -gal expression level was 3.5-fold higher in gonococci with the  $P_{mtrC-lacZ}$  fusion that contained the G nucleotide in the -35 sequence of *mtrCDE* promoter compared to the variant that had the T nucleotide. This result suggests that the T to G change observed in the -35 hexamer of the *mtrCDE* promoter possessed by CDC2 as well as other isolates (30) results in a more effective *mtrCDE* promoter than that possessed non-mosaic strain FA19. However, since MtrR can activate certain gonococcal genes (34) it was necessary to eliminate the (remote) possibility that the T to G nucleotide change facilitated binding of MtrR D79N to the *mtrCDE* promoter in an activating capacity. Accordingly, we introduced the  $P_{mtrC-lacZ}$  fusion in pLES2.2 into strain JF1 (FA19  $\Delta mtrR$ ). The results showed that compared to CR.102, expression of  $P_{mtrC-lacZ}$  from the pLES2.2 fusion in JF1 was slightly elevated (data not presented), which is consistent with the MtrR D79N

236 protein in CR.102 retaining a degree of transcriptional repressive activity as opposed to becoming an activator  
237 of *mtrCDE*.

238 **Mutations in *mtrD* due to acquisition of a mosaic-like sequence can increase antimicrobial**  
239 **resistance.** The results from the gene expression studies described above implicated the T to G change in the -  
240 35 *mtrCDE* promoter hexamer as having a strong *cis-acting* influence that de-represses *mtrCDE* expression  
241 leading to decreased susceptibility of gonococci to antimicrobials, including Azi. Collectively, these findings  
242 likely explain the levels of *mtrR* and *mtrCDE* gene expression in *mtr* mosaic-like strain CDC2 and other clinical  
243 isolates (26, 30) that possess this mutation. However, these transcriptional changes could not fully explain the  
244 higher MIC values of certain antimicrobials against CDC2. Thus, although transformant strain CR.100 had  
245 decreased susceptibility to all tested antimicrobials, only the MIC values of crystal violet (CV) and TX-100  
246 matched that of CDC2 (Table 1). We hypothesized that amino acid differences in MtrD efflux pump transporter  
247 protein possessed by CDC2 compared to FA19 and CR.100 might account for the higher Azi MIC seen with  
248 strain CDC2. Based on the structure of MtrD (PDB 4MTI, ref. 36) and known similarity to AcrB (43), the  
249 following amino acid changes in MtrD possessed by strain CDC2 are predicted (E. Yu, personal  
250 communication) to impact its binding of antimicrobials: T42N, H46R, I48T, N101D, V662I, and K823E. To  
251 test whether these or other amino acid changes contribute to antimicrobial resistance in CDC2, three  
252 overlapping PCR products (summarized in Fig. S4) encompassing its entire *mtrD* gene were used together to  
253 transform strain CR.100 for resistance to 1  $\mu\text{g/ml}$  of Azi. A resulting transformant (CR.103) was examined in  
254 antimicrobial susceptibility assays and was found to have identical levels of resistance as CDC2 to Azi (MIC of  
255 2  $\mu\text{g/ml}$ ) and Ery (MIC of 4  $\mu\text{g/ml}$ ), but was two-fold less resistant than CDC2 to the dye EB (Table 1). DNA  
256 sequencing of *mtrD* PCR products from CDC2, CR.100 and CR.103 showed that the nucleotide sequence of  
257 *mtrD* in these strains was identical to that of FA19 until codon 738 after which the CDC2 sequence had  
258 recombined in CR.103 until codon 1020. This recombination event generated twenty-three amino acid  
259 replacements in the C-terminal end of MtrD (Fig. 6). The amino-acid changes in this C-terminal region of  
260 MtrD are located in the DC sub-domain of the docking domain as well as in the PC2 sub-domain of the pore

261 region and transmembrane domains TM8 and TM9 (36). As assessed by qRT-PCR, CR.100 and CR.103 did  
262 not differ in levels of the *mtrD* transcript (data not presented), indicating that differences in levels of  
263 antimicrobial resistance between these strains was linked to structural alterations of MtrD located at the C-  
264 terminal end.

265 In order to verify that amino acid changes in the C-terminal region of MtrD from CR.103 could increase  
266 MIC values of Azi, we prepared an *mtrD* 3'-end PCR product described above from CR.103 and used it to  
267 transform CR.100 with selection for resistance to 1 µg/ml of Azi. Six individual transformants were assessed in  
268 antimicrobial susceptibility testing assays using Azi and Ery and all showed an elevated level of resistance to  
269 these macrolides comparable to that observed with donor strain CR.103 (data not presented). Differences were  
270 detected in the nucleotide sequence of the donated 3'-end of *mtrD* in the transformants indicating that unique  
271 sites of recombination had occurred. Translation of the nucleotide sequence to amino acid sequence showed  
272 similar as well as unique amino acid changes in each transformant strain (data not presented). Importantly,  
273 however, only two amino acid changes, positioned at 821 (Ser to Ala) and 823 (Lys to Glu), were common in  
274 all six transformants. In fact, one transformant (CR.104) had only these two amino acid changes (Fig. 6 and  
275 Table 2) compared to recipient strain CR.100. We also sequenced the entire *mtr* locus (6,793 bp) possessed by  
276 strains FA19 and CR.104 and found that except for the nucleotide differences in the *mtrR* coding, *mtrR-mtrCDE*  
277 intervening region and the *mtrD* allele of CR.104, the *mtr* locus in these strains were otherwise identical (data  
278 not presented). The MIC values of antimicrobials against CR.104 were identical to that of donor strain CR.103  
279 (Table 1); the sole exception was with CV for which CR.104 was 2-fold more resistant.

## 280 DISCUSSION

281 Recombination of commensal neisserial DNA sequences into the chromosome of *N. gonorrhoeae* and *N.*  
282 *meningitidis* has been well established (26, 30, 37-39). Such horizontal transmission of DNA can endow  
283 gonococci or meningococci with decreased susceptibility to antibiotics that target the respective gene product.  
284 The best example of the consequence of this genetic exchange event is that of mosaic sequences in the *pbp2*  
285 gene (also known as *penA*), which encodes the beta-lactam sensitive target, penicillin-binding protein 2 (PBP2)

286 (40). The extensive re-modeling of PBP2 that occurs due to the multiple (up to 60) amino acid changes due to a  
287 mosaic *pbp2* decreases the acylation rate of penicillin and third generation cephalosporins (cefixime and  
288 ceftriaxone) (41). *pbp2* mosaic gonococcal strains also frequently contain *cis*-acting regulatory mutations that  
289 increase expression of the *mtrCDE* efflux pump operon (reviewed in [3]). Loss of the MtrCDE efflux pump in  
290 chromosomally-mediated penicillin resistant gonococci can result in a return to a penicillin-sensitive phenotype  
291 (29, 42), while a similar loss can result in a 2-4- fold increase in susceptibility to Cro and Azi (29). Thus,  
292 mutations that de-repress *mtrCDE* expression can work with mosaic *pbp2* to decrease gonococcal susceptibility  
293 to beta-lactams.

294 The mosaic-like *mtrR/mtrCDE* promoter region described herein and that reported by Wadsworth *et al.*  
295 (30) emphasizes that in gonococci nucleotide changes due to acquisition of mosaic-like *mtr* sequences can  
296 elevate *mtrCDE* expression and MICs of antibiotics; a graphic model describing the influence of these  
297 nucleotide changes was recently presented in a commentary (44) by the corresponding author (W.M.S.) on the  
298 Wadsworth *et al.* manuscript. We propose that the single nucleotide change (T to G) within the -35 hexamer of  
299 the *mtrCDE* promoter provides increased expression of *mtrCDE* as this change results in a consensus -35  
300 hexamer sequence for sigma-70 promoters. Further, since this nucleotide change is also within the 13 bp  
301 inverted repeat positioned between the -10 and -35 regions of the *mtrR* promoter it could alter the ability of this  
302 sequence to form a DNA secondary structure with regulatory activity. Thus, the position of this nucleotide  
303 change would maintain the spacing between the -10 and -35 hexamers of the *mtrR* promoter but would reduce  
304 the T:A bp repeat from 6 to 4. This reduction in the T:A bp repeat may impact promoter recognition by RNA  
305 polymerase, which preferentially shifts its recognition from the *mtrR* promoter to the *mtrCDE* promoter that has  
306 an improved -35 hexamer sequence. It should also be noted that *mtr* mosaic-like CDC2 exhibited a low level of  
307 *mtrR* expression possibly due to the nucleotide change in the -35 hexamer of the *mtrR* promoter (Figs. 2 and 3).  
308 We hypothesize that this may also contribute to the low levels of MtrR in this and other clinical isolates.  
309 Interestingly, when the MtrR D79N mutation from CDC2 was placed into strain FA19, which has a WT *mtrR*

310 promoter, levels of MtrR increased significantly (Fig. 4) indicating that this mutation can cause dysregulation of  
311 autoregulation of *mtrR* expression.

312 While the -35 *mtrCDE* promoter mutation can endow gonococci with increased expression of *mtrCDE*  
313 (Fig. 2) and elevate gonococcal resistance to antimicrobials, it did not account for the Azi MIC observed with  
314 clinical isolate CDC2 (Tables 1 and 2). In this respect, the results presented herein and that of Wadsworth *et al.*  
315 (30) show that amino acid changes in *mtrD*, which result from importation of commensal neisserial DNA, are  
316 also necessary for the less Azi-susceptible phenotype of *mtr* mosaic-like strains such as CDC2 and GCGS0402.  
317 Based on the published MtrD structure (36), many of the amino acid positions in MtrD that are changed in  
318 CDC2 versus antibiotic-sensitive strain FA19 could influence drug binding, efflux activity or protein stability.  
319 Results from our transformation experiments indicated, however, that amino acid changes in the C-terminal end  
320 of MtrD, especially at positions 821 (S821A) and 823 (K823E), are sites for gain-of-function mutations that can  
321 contribute to antimicrobial resistance seen in *mtr* mosaic-like strains. These two amino acids are within the  
322 PC2 region of MtrD that is part of the pore domain of this transporter and is located at the outermost region that  
323 faces the periplasm. Based on the structural comparison of MtrD with the orthologous AcrB protein (44),  
324 position 823 in MtrD is predicted to be a site for binding antimicrobials (E. Yu, personal communication).  
325 Amino acid changes located elsewhere in MtrD could also have a similar impact, as indicated by the higher EB  
326 MIC value against CDC2 versus transformant strains CR.103 and CR.104. We note that the S821A and K823E  
327 changes are also present in the MtrD protein of the GCGS0402 and GCGS0834 strains studied by Wadsworth *et*  
328 *al.* (30); interestingly, GCGS0276, that also possesses a mosaic-like *mtrD*, has a K823D change that may have a  
329 similar functional impact on MtrD activity as the K823E mutation (30).

330 Active international and national surveillance systems for determining trends in gonococcal resistance to  
331 antibiotics coupled with whole genome sequencing and bioinformatic analyses have been instrumental in  
332 detecting gonococci with resistance determinants including those generated by mosaic-like *mtr* sequences (45-  
333 49). The detailed molecular, genetic and phenotypic analyses made possible by these efforts have provided new  
334 insights regarding the impact of the gonococcal MtrCDE efflux pump in determining levels of bacterial

335 resistance to clinically important antibiotics. The world-wide distribution of strains with mosaic-like *mtr* loci  
336 indicates that future diagnostic tests for resistance determinants should include functionally important  
337 nucleotide changes that were not described in earlier studies (summarized in [13]). Further, the presence of  
338 such gonococcal strains re-emphasizes that genetic exchange between gonococci and commensal *Neisseria*,  
339 which is likely to occur in the pharyngeal cavity, can be a major mechanism by which *N. gonorrhoeae* develops  
340 resistance to antibiotics. Thus, in order to enhance monitoring of antibiotic resistance trends, it would be  
341 prudent to routinely sample both genital and extra-genital (especially the oral mucosae) sites for the presence of  
342 gonococci in patients suspected of having gonorrhea so as to better detect emergence of antibiotic resistant  
343 strains in the community.

## 344 MATERIALS AND METHODS

345 **Gonococcal strains, growth conditions, oligonucleotide primers and determination of susceptibility**  
346 **to antimicrobial agents.** The gonococcal strains used in this study are presented in Tables S1 and S2. The  
347 clinical strains used in this investigation were kindly provided by Edward Bannister, PhD (Dallas, TX) and the  
348 Dallas, TX GISP sentinel site. These strains were provided to CDC without patient identifiers and as such,  
349 there was no involvement of human subjects in the research reported herein. For most genetic studies we used  
350 antimicrobial-sensitive strain FA19 with an introduced *rpsL* mutation (FA19 Str<sup>R</sup>) that confers high level  
351 resistance to streptomycin, but for brevity it is referred to as FA19 throughout the text (Table S2). Eight  
352 gonococcal clinical strains displaying decreased Azi-susceptibility between 2014 and 2015 were also included  
353 in this study (Table S1). The details of their WGSs and bioinformatic analysis will be presented elsewhere  
354 (Soge and McLean, in preparation). Briefly, the eight strains were selected based on their representation within  
355 one of four different clades that were identified by analysis of a generated phylogentic tree from thirty-seven  
356 strains. Of these, strain LRRBGS0002 (CDC2; Table S2) was the most extensively studied. Gonococcal strains  
357 were grown overnight at 37°C under 5 % (v/v) CO<sub>2</sub> on GCB agar containing defined supplements I and II (21).  
358 The sequences of oligonucleotide primers used in this study are shown in Table S2. The MICs of



359 antimicrobials were determined by the agar dilution method (50) using the GISP protocol (51). Antimicrobials  
360 were purchased from Sigma Chemical Co. (St. Louis, MO).

361 **Bioinformatic analyses of WGS information.** To compare the sequences of the *mtr* loci among the strains,  
362 sequences for strains FA19, FA1090, and MS11 were retrieved from NCBI genome sequence database  
363 (<https://www.ncbi.nlm.nih.gov/nuccore/>) or NCBI Sequence Read Archive (<https://www.ncbi.nlm.nih.gov/sra>);  
364 the H041 WGS sequence was kindly provided by R. Nicholas (University of North Carolina-Chapel Hill, NC).  
365 Sequence read files for LRRB strains used in this study (Table S1) were downloaded from NCBI Sequence  
366 Read Archive (<https://www.ncbi.nlm.nih.gov/sra>) into CLC Genomics Workbench  
367 (<https://www.qiagenbioinformatics.com/>), where we performed trimming, *de novo* assembly, and a BLAST of  
368 the FA19 *mtr* locus sequence (GenBank accession number CP012026.1, nucleotides 1104741-1111533) against  
369 the newly assembled sequences in order to recover their *mtr* locus sequences for alignment. Raw sequence files  
370 for GCGS0276, GCGS0402, and GCGS0834 (30) were downloaded from NCBI SRA, and trimmed and  
371 assembled according to published methods with cutadapt (52) and SPAdes (53). NCBI-blast toolkit (BlastN  
372 [<https://www.blast.ncbi.nlm.nih.gov>]) retrieved the sequences for the *mtr* operon based on FA19 *mtr* locus  
373 sequence. Alignments were performed using the Clustal Omega multiple sequence alignment tool for  
374 nucleotide and amino acid sequences (54, 55), and percent identity values were obtained from the resulting  
375 pairwise identity matrix. The Newick file derived from the alignment was visualized using Interactive Tree of  
376 Life (iTOL) (56).

377 **Strain constructions.** To construct mutants of the eight decreased Azi-susceptible clinical isolates  
378 genomic DNA from strains KH14 (FA19*mtrD*::*kan*), FA19*norM*::*kan* and FA19*macA*::*kan* were used in  
379 transformation experiments as described previously (21) and verified by PCR using oligonucleotide primer  
380 pairs for each gene (Table S3). Strains KH14 and FA19*norM*::*kan* have been previously described (21, 57).  
381 FA19*macA*::*kan* was constructed in this study. Briefly, primers macAF and macAR (Table S2) were used to  
382 PCR amplify *macA* from FA19 genomic DNA. The resulting PCR product was cloned into the pBAD-TOPO  
383 vector as described by manufacturer (Invitrogen) to create pBAD*macA*, which was then digested with SmaI.

384 The non-polar kanamycin (Kan) resistance cassette *aphA3* (58) was cloned into the SmaI site and the resulting  
385 plasmid (pBAD*macA::kan*) was transformed into FA19. Transformants were selected on GCB agar containing  
386 50 µg/ml of kan and were verified by PCR. PCR products were generated using CDC2 genomic DNA and  
387 primers CEL1 and KH9#12B (to construct CR.100) or primers CEL4 and mtrCpromR (to construct CR.101) or  
388 primers CEL1 and KH9#10B (to construct CR.102). The resulting PCR products were transformed into FA19  
389 as previously described (18). CR.100 clones were selected on GC plates supplemented with 3,600 µg/ml of TX-  
390 100. CR.101 was selected on GC plates supplemented with 0.25 µg/ml of Azi. CR.102 was selected on GC  
391 plates supplemented with 400 µg/ml of TX-100. The presence of mutations in the clones was verified by  
392 sequencing. For construction of CR.103, PCR products were generated with primers mtrD11Rev and mtrD3,  
393 mtrD3Rev and mtrD1, and mtrE12 and mtrD10 using CDC2 genomic DNA as template. The 3 PCR products  
394 were used together to transform strain CR.100 using a selection of 1 µg/ml of Azi; a resulting transformant was  
395 termed CR.103. For construction of CR.104, a PCR product was generated with primers mtrD10 and mtrE12  
396 on genomic DNA from CR.103. The resulting PCR was transformed into CR.100 and clones were selected on  
397 GC agar plates supplemented with 1 µg/ml of Azi.

398 **Quantitative reverse transcriptase-polymerase chain reactions (qRT-PCR).** RNA was extracted  
399 from strains FA19, CDC2, CR.100, CR.101, CR.102 and CR.104 at mid-logarithmic phase of growth in GC  
400 broth plus supplements by the TRIzol method as directed by the manufacturer (Thermo Fisher Scientific,  
401 Waltham, MA) and was performed as described (59). Briefly, genomic DNA (gDNA) was removed by RNase-  
402 free DNase treatment and gDNA Wipeout (Qiagen, Germantown, MD). The resulting RNA was then reverse  
403 transcribed to cDNA using the QuantiTect Reverse Transcriptase kit (Qiagen) as described (57). Primers  
404 16Smai\_qRTF and 16Smai\_qRTR were used for 16S rRNA. Primers mtrEqPCR-F and mtrEqPCR-R were used  
405 for the *mtrE* gene, primers mtrD8 And mtrD13 were used for the *mtrD* gene. Primers mtrR\_qRT\_F and  
406 mtrR\_qRT\_R were used for the *mtrR* gene. Sequences of primers are shown on Table S2. Results were  
407 calculated as normalized expression ratios (NER) using 16S rRNA expression levels. Statistical significance  
408 was calculated by Student's t-test.

409 **Western immunoblot analysis.** Whole-cell lysates were prepared from gonococcal strains grown  
410 overnight on GC agar plates with supplements as described previously and separated by sodium dodecyl sulfate  
411 polyacrylamide gel electrophoresis (SDS-PAGE) (60). Coomassie brilliant blue (CBB) staining of duplicate  
412 SDS-PAGE gels was performed to calibrate and verify consistent loading of proteins (15  $\mu$ g) loaded into each  
413 well. The concentration of protein in whole cell lysates was estimated by using a Nanodrop spectrometer at 280  
414 nM. Western immunoblotting using a mouse anti-MtrE serum (kindly provided by A. Jerse) and a rabbit anti-  
415 MtrR serum was performed as described previously (23, 34).

416  **$\beta$ -gal assays.** *lacZ* fusions were constructed using the pLES94 system as previously described (35).  
417 Briefly, PCRs were performed on genomic DNA from strain CDC2 using primers C2 and C3PmtrC for  
418 pLES2.2 and C4 and C3PmtrC for pLES4.1. The resulting PCR products were cloned into the BamHI site of  
419 pLES94. pLES94, pLES2.2 and pLES4.1 and were introduced into strains CR.102 or JF1 by transformation  
420 with selection on GC agar plates supplemented with 1  $\mu$ g/ml of chloramphenicol.  $\beta$ -gal assays were performed  
421 in triplicate as described by Folster *et al.* (34) from lysates of gonococcal strains after growth overnight on GC  
422 agar plates supplemented with chloramphenicol. The  $\beta$ -gal specific activity was calculated using the formula:  
423  $A_{420} \times 1000 / A_{280} \text{ (mg/ml)} \times \text{time (min)} \times \text{volume (ml)}$ .

424 **Primer extension analysis.** Total RNA from strains FA19 and CDC2 was prepared from mid and late-  
425 logarithmic phase GCB broth cultures by the TRIzol method as directed by the manufacturer (Thermo Fisher  
426 Scientific, Waltham, MA). Primer extension experiments were performed as described previously (18) on 6  $\mu$ g  
427 of total RNA with primer PEmtrC181. Primer extension transcription start site of the *mtrC* gene was determined  
428 by electrophoresis of the extension products on a 6% (w/v) DNA sequencing acrylamide gel adjacent to  
429 reference sequencing reactions.

434 **REFERENCES**

- 435 1. CDC. 2017. Sexually Transmitted Disease Surveillance 2016. <https://www.cdc.gov/std/stats>. Accessed July  
436 31, 2018.
- 437 2. Newman L, Rowley J, Vander Hoorn S, Saman Wijesooriya N, Unemo M, Low N, Stevens G, Gottlieb S,  
438 Kiarie J, Temmerman M. 2015. Global estimates of the prevalence and incidence of four curable sexually  
439 transmitted infections in 2012 based on systematic review and global reporting. PLoS ONE 10(12).
- 440 3. Unemo M, Shafer WM. 2014. Antimicrobial Resistance in *Neisseria gonorrhoeae* in the 21st Century—Past,  
441 Evolution and Future. Clin. Microbiol. Rev. 27:587-613.
- 442 4. Bolan GA, Sparling PF, Wasserheit JN. 2012. The emerging threat of untreatable gonococcal infection. N.  
443 Engl. J. Med. 366:485-487.
- 444 5. Unemo M, del Rio C, Shafer WM. 2016. Antimicrobial resistance expressed by *Neisseria gonorrhoeae*: a  
445 major global public health problem in the 21st century. Microbiol.Spectr. 4(3). doi:10.1128/microbiolspec.EI10-  
446 0009-2015.
- 447 6. Workowski KA, Bolan GA. 2015. Sexually transmitted diseases treatment guidelines, 2015. MMWR  
448 Recomm. Rep. 64 (RR-03):1-137.
- 449 7. Bignell C, Unemo M. 2013. 2012. European guideline on the diagnosis and treatment of gonorrhoea in  
450 adults. Int. J. STD AIDS 24:85-92.
- 451 8. Fifer H, Natarajan U, Alexander S, Hughes G, Golparian D, Unemo M. 2016. Failure of dual  
452 antimicrobial therapy in treatment of gonorrhoea. N. Engl. J. Med. 374: 25.
- 453 9. Ohnishi M, Golparian D, D., Shimuta K., Saika T, Hoshina, Iwaskai K., Nakayama S, Kitawaki J., Unemo  
454 M. 2011. Is *Neisseria gonorrhoeae* initiating a future era of untreatable gonorrhoea?: detailed characterization of  
455 the first strain with high-level resistance to ceftriaxone. Antimicrob. Agents Chemother, 55, 3538-45.
- 456 10. Unemo M, Golparian D, Nicholas R, Ohnishi M, Gallay A, Sednaoui P. 2012. High-level cefixime- and  
457 ceftriaxone-resistant *N. gonorrhoeae* in France: novel *penA* mosaic allele in a successful international clone  
458 causes treatment failure. Antimicrob. Agents Chemother. 56:1273-1280.

- 459 11. Public Health England. 2018 . UK case of *Neisseria gonorrhoeae* with high-level resistance to  
460 azithromycin and resistance to ceftriaxone acquired abroad. Health Protection Report Advanced Access Report.  
461 Public Health England.
- 462 12. Rice PA, Shafer WM, Ram S, and Jerse AE. 2017. *Neisseria gonorrhoeae*: drug resistance, mouse models  
463 and vaccine development. Annual Rev. Microbiol. 2017 Sep 8;71: 665-686. doi: 10.1146/annurev-micro-  
464 090816-093530.
- 465 13. Shafer WM, Yu EW, Rouquette-Loughlin C, Golparian D, Jerse AE, and Unemo M. 2016. *Neisseria*  
466 *gonorrhoeae* Efflux Pumps: Contributions to Antibiotic Resistance and Virulence. Springer Press. In: Efflux  
467 Mediated Drug Resistance in Bacteria: Mechanisms, Regulation and Clinical Implications. Chapter 17. DOI:  
468 10.1007/978-3-319-39658-3\_17.
- 469 14. Lucas CE, Balthazar JT, Hagman KE, Shafer WM. 1997. The MtrR repressor binds the DNA sequence  
470 between the *mtrR* and *mtrC* genes of *Neisseria gonorrhoeae*. J. Bacteriol. 179(13): 4123-8
- 471 15. Hoffmann KM, Williams D, Shafer WM, Brennan RG. 2005. Characterization of the multiple transferrable  
472 repressor, MtrR, from *Neisseria gonorrhoeae*. J. Bacteriol. 187(14):5008-12.
- 473 16. Rouquette C, Harmon JB, and Shafer WM. 1999. Induction of the *mtrCDE*-encoded efflux pump system  
474 of *Neisseria gonorrhoeae* requires MtrA, an AraC-like protein. Mol. Microbiol. 33: 651-658.
- 475 17. Zalucki YM, Dhulipala V, Shafer WM. 2012. Dueling regulatory properties of a transcriptional activator  
476 (MtrA) and repressor (MtrR) that control efflux pump gene expression in *Neisseria gonorrhoeae*. mBio 3(6)  
477 e00446-12: 1-8.
- 478 18. Hagman KE, Shafer WM. 1995. Transcriptional control of the *mtr* efflux system in *Neisseria*  
479 *gonorrhoeae*. J. Bacteriol. 177(14):4162-5.
- 480 19. Ohneck EA, Zalucki YM, Johnson PJ, Dhulipala V, Golparian D, Unemo M, Jerse AE, Shafer WM.  
481 2011. A novel mechanism of high-level, broad-spectrum antibiotic resistance caused by a single base pair  
482 change in *Neisseria gonorrhoeae*. Mbio. 2(5): e00187-11.
- 483 20. Pan W, Spratt BG. 1994. Regulation of the permeability of the gonococcal cell envelope by the *mtr*

- 484 system. *Mol. Microbiol.* 11:769-775.
- 485 21. Hagman KE, Pan W, Spratt BG, Balthazar JT, Judd RC, Shafer WM. 1995. Resistance of *Neisseria*  
486 *gonorrhoeae* to antimicrobial hydrophobic agents is modulated by the *mtrRCDE* efflux system. *Microbiol.*  
487 141: 611-622.
- 488 22. Shafer WM, Balthazar JT, Hagman KE, Morse SA. 1995. Missense mutations that alter the DNA-  
489 binding domain of the MtrR protein occur frequently in rectal isolates of *Neisseria gonorrhoeae* that are  
490 resistant to faecal lipids. *Microbiol.* 141 (Pt 4):907.
- 491 23. Warner DM, Shafer WM, Jerse AE. 2008. Clinically relevant mutations that cause derepression of the  
492 *Neisseria gonorrhoeae* MtrC-MtrD-MtrE efflux pump system confer different levels of antimicrobial resistance  
493 and *in vivo* fitness. *Mol. Microbiol.* 70:462-478.
- 494 24. Jerse AE, Sharma ND, Simms AN, Crow ET, Snyder LA, Shafer WM. 2003. A gonococcal efflux pump  
495 system enhances bacterial survival in a female mouse model of genital tract infection. *Infect.*  
496 *Immun.* 71(10):5576-82.
- 497 25. Grad YH, Harris SR, Kirkcaldy RD, Green AG, Marks DS, Bentley SD, et al. 2016. Genomic  
498 epidemiology of gonococcal resistance to extended-spectrum cephalosporins, macrolides, and fluoroquinolones  
499 in the United States, 2001-2013. *J. Infect. Dis.* 214:1579-1587
- 500 26. Trembizki E, Doyle C, Jennison A, Smith H, Bates, Lahra M, et al. 2014. A *Neisseria gonorrhoeae* strain  
501 with a meningococcal *mtrR* sequence. *J. Med. Microbiol.* 63:1113-1115.
- 502 27. Demczuk W, Martin I, Peterson S, Bharat A, Van Domselaar G, Graham M, et al. 2016. Genomic  
503 epidemiology and molecular resistance mechanisms of azithromycin-resistant *Neisseria gonorrhoeae* in Canada  
504 from 1997-2014. *J. Clin. Microbiol.* 54: 1304-1313.
- 505 28. Whiley DM, Kundu RI, Jennison AV, Buckley C, Limmios A, Hogan T, et al. 2018. Azithromycin-resistant  
506 *Neisseria gonorrhoeae* spreading amongst men who have sex with men (MSM) and heterosexuals in New  
507 South Wales, Australia, 2017. *J. Antimicrob. Chemother.* 17:148-155.
- 508 29. Golparian D, Shafer WM, Ohnishi M, and Unemo M. 2014. Importance of multi-drug efflux pumps in the

- 509 antimicrobial resistance property of clinical multi-drug resistant isolates of *Neisseria gonorrhoeae*: rationale for  
510 targeting efflux systems for drug development. *Antimicrob. Agents Chemother.* 58:3556-3559.
- 511 30. Wadsworth CB, Arnold BJ, Satar MRA, Grad YH. 2018. Azithromycin resistance through interspecific  
512 acquisition of an epistasis dependent efflux pump component and transcriptional regulator in *Neisseria*  
513 *gonorrhoeae*. *MBio.* doi.org/10.1128/mBio.01419-18.
- 514 31. Galarza PG, Abad R, Canigia LF, Buscemi L, Pagano I, Oviedo C, Vázquez JA. 2010. New mutation in 23S  
515 rRNA gene associated with high level of azithromycin resistance in *Neisseria gonorrhoeae*. *Antimicrob. Agents*  
516 *Chemother.* 54:1652-1653.
- 517 32. Barza M. 1994. Challenge to antibiotic activity in tissues. *Clin. Infect. Dis.* 19:910-915.
- 518 33. Correia FF, Inouye S, Inouye M. 1988. A family of small repeated elements with some transposon-like  
519 properties in the genome of *Neisseria gonorrhoeae*. *J. Biol. Chem.* 263:12194–12198.
- 520 34. Folster JP, Johnson PJ, Jackson L, Dhulipali V, Dyer DW, Shafer WM. 2009. MtrR modulates *rpoH*  
521 expression and levels of antimicrobial resistance in *Neisseria gonorrhoeae*. *J. Bacteriol.* 191(1):287-97.
- 522 35. Silver LE, Clark VL. 1995. Construction of a translational *lacZ* fusion system to study gene regulation in  
523 *Neisseria gonorrhoeae*. *Gene* 166: 101-104.
- 524 36. Bolla JR, Su CC, Radhakrishnan A, Kumar N, Chou T-H, Do SV, Delmar JA, Lei HL, Rajashankar KR,  
525 Shafer WM, and Yu EW. 2014. Crystal structure of the *Neisseria gonorrhoeae* MtrD inner membrane multidrug  
526 efflux pump. *PloS One.* Jun 5; 9 (6):e97903. doi: 10.1371/journal.pone.0097903.
- 527 37. Spratt BG, Bowler LD, Zhang QY, Zhou J, Smith JM. 1992. Role of interspecies transfer of chromosomal  
528 genes in the evolution of penicillin resistance in pathogenic and commensal *Neisseria* species. *J. Mol. Evol.*  
529 34:115-125.
- 530 38. Bowler LD, Zhang QY, Riou JY, Spratt BG. 1994. Interspecies recombination between the *penA* genes of  
531 *Neisseria meningitidis* and commensal *Neisseria* species during the emergence of penicillin resistance in  
532 *Neisseria meningitidis*: natural events and laboratory stimulation. *J. Bacteriol.* 176:333-337.



- 533 39. Shimuta K, Unemo M, Nakayama S, Morita-Ishihara T, Dorin M, Kawahata T, Ohnishi M. 2013.  
534 Antimicrobial resistance and molecular typing of *Neisseria gonorrhoeae* isolates in Kyoto and Osaka, Japan,  
535 2010 to 2012: intensified surveillance after identification of the first strain (H041) with high-level ceftriaxone  
536 resistance. *Antimicrob. Agents Chemother.* 57:5225-5232.
- 537 40. Spratt BG. 1988. Hybrid penicillin-binding proteins in penicillin-resistant strains of *Neisseria gonorrhoeae*.  
538 *Nature* 332:173-176.
- 539 41. Tomberg J, Unemo M, Davies C, Nicholas RA. 2010. Molecular and structural analysis of mosaic variants  
540 of penicillin-binding protein 2 conferring decreased susceptibility to expanded-spectrum cephalosporins in  
541 *Neisseria gonorrhoeae*: role of epistatic mutations. *Biochem.* 49:8062-8070.
- 542 42. Veal WL, Nicholas RA, Shafer WM. 2002. Overexpression of the MtrC-MtrD-MtrE efflux pump due to an  
543 *mtrR* mutation is required for chromosomally mediated penicillin resistance in *Neisseria gonorrhoeae*. *J.*  
544 *Bacteriol.* 184(20):5619-24.
- 545 43. Murakami S, Nakashima R, Yamashita E, Yamaguchi A. 2002. Crystal structure of bacterial multidrug  
546 efflux transporter AcrB. *Nature* 419:587-593. doi:10.1038/nature01050.
- 547 44. Shafer WM. 2018. Mosaic drug efflux gene sequences from commensal *Neisseria* can lead to low-level  
548 azithromycin resistance expressed by *Neisseria gonorrhoeae* clinical isolates. *mBio*. September/October 2018.  
549 9(5): e01747-18
- 550 45. Dillon JA, Trecker MA, Thakur SD; Gonococcal Antimicrobial Surveillance Program Network in Latin  
551 America and the Caribbean 1990–2011. 2013. Two decades of the gonococcal antimicrobial surveillance  
552 program in South America and the Caribbean: challenges and opportunities. *Sex. Transm. Infect.* 89 Suppl  
553 4:iv36-iv41.
- 554 46. Kirkcaldy RD, Kidd S, Weinstock HS, Papp JR, Bolan GA. 2013. Trends in antimicrobial resistance in  
555 *Neisseria gonorrhoeae* in the USA: the Gonococcal Isolate Surveillance Project (GISP), January 2006-June  
556 2012. *Sex. Transm. Infect.* 89 Suppl 4:iv5-10.

- 557 47. Kubanova A, Frigo N, Kubanov A, Sidorenko S, Pripudnevich T, Vachnina T, Al-Khafaji N, Polevshikova  
558 S, Solomka V, Domeika M, Unemo M. 2008. National surveillance of antimicrobial susceptibility in *Neisseria*  
559 *gonorrhoeae* in 2005-2006 and recommendations of first-line antimicrobial drugs for gonorrhoea treatment in  
560 Russia. *Sex. Transm. Infect.* 84:285-289.
- 561 48. Lahra MM, Lo YR, Whiley DM. 2013. Gonococcal antimicrobial resistance in the Western Pacific Region.  
562 *Sex. Transm. Infect.* 89 Suppl 4:iv19-23.
- 563 49. Johnson SR, Sandul AL, Parekh M, Wang SA, Knapp JS, Trees DL. 2003. Mutations causing in vitro  
564 resistance to azithromycin in *Neisseria gonorrhoeae*. *International Journal of Antimicrobial Agents.* 21:414-  
565 419.
- 566 50. Sarubbi FA Jr, Blackman E, Sparling PF. 1974. Genetic mapping of linked antibiotic resistance loci in  
567 *Neisseria gonorrhoeae*. *J. Bacteriol.* 120(3):1284-92.
- 568 51. Centers for Disease Control and Prevention. Division of Sexually Transmitted Diseases Prevention.  
569 Gonococcal Isolate Surveillance Project (GISP). Link: <http://www.cdc.gov/std/gisp/>.
- 570 52. Martin M. 2011. CutAdapt Removes Adapter sequences from high-throughput sequencing reads. (2011).  
571 *EMBnet.journal.* [SI], v17:1, 10. doi.org/10.14806/ej.17.1.200
- 572 53. Bankevich A, Nurk S, Antipov D, Gurevich A, Dvorkin M, Kulikov AS, Lesin V, Nikolendo S, Pham S,  
573 Prjibelski A, Pyshkin A, Sirotkin A, Vyahhi N. 2012. SPAdes: A new genome assembly algorithm and  
574 its applications to single-cell sequencing. *Journal of Computational Biology.*
- 575 54. Sievers F, Wilm A, Dineen DG, Gibson TJ, Karplus K, Li W, Lopez R, McWilliam H, Remmert M, Söding  
576 J, Thompson JD, Higgins D. 2011. Fast, scalable generation of high-quality protein multiple sequence  
577 alignments using Clustal Omega. *Molecular Systems Biology* 7 Article number: 539 doi:10.1038/msb.2011.75
- 578 55. Goujon M, McWilliam H, Li W, Valentin F, Squizzato S, Paern J, Lopez R. 2010. A new bioinformatics  
579 analysis tools framework at EMBL-EBI (2010). *Nucl. Acids Res.* 38 Suppl: W695-9 doi:10.1093/nar/gkq313
- 580 56. Letunic I, Bork P. 2016. Interactive tree of life (iTOL) v3: an online tool for the display and annotation of  
581 phylogenetic and other trees. *Nucl. Acids Res.* 44 (W1):W242-5. doi: 10.1093/nar/gkw290

- 582 57. Rouquette-Loughlin C, Dunham SA, Kuhn M, Balthazar J, Shafer WM. 2003. The NorM efflux pump  
583 of *Neisseria gonorrhoeae* and *Neisseria meningitidis* recognizes antimicrobial cationic compounds. J.  
584 Bacteriol. 185:1101-6.
- 585 58. Ménard R, Sansonetti PJ, Parsot C. 1993. Nonpolar mutagenesis of the *ipa* genes defines IpaB, IpaC,  
586 and IpaD as effectors of *Shigella flexneri* entry into epithelial cells. J. Bacteriol. 175:5899-5906.
- 587 59. Rouquette-Loughlin CE, Zalucki YM, Dhulipala VL, Balthazar JT, Doyle RG, Nicholas RA, Begum  
588 AA, Raterman EL, Jerse AE, Shafer WM. 2017. Control of *gdhR* expression in *Neisseria gonorrhoeae* by  
589 autoregulation and a master repressor (MtrR) of a drug efflux pump operon. mBio. 8 (2): e00449-17.
- 590 60. Laemmli UK. 1970. Cleavage of structural proteins during the assembly of the head of bacteriophage T4.  
591 Nature. 227: 680-685.
- 592

593

594 **ACKNOWLEDGEMENTS**

595 We thank E. Yu (Case Western University) for his insightful comments regarding MtrD structure and impact of  
596 mutations with respect to binding antimicrobials. We would also like to thank the Gonococcal Isolate  
597 Surveillance Project (GISP) for the use of isolates and corresponding data for this analysis. Edward Bannister,  
598 PhD (Dallas, TX) and the Dallas, TX GISP sentinel site collected, isolated and provided epidemiological data  
599 for the isolates used in this analysis. The University of Washington GISP Regional Laboratory (Seattle, WA)  
600 determined and provided antimicrobial susceptibility result data for the isolates used in this analysis. We also  
601 thank Steven Johnson, Hsi Liu, Matthew Schmerer, Sandra Seby, Jesse Thomas, and Eshaw Vidyaprakash for  
602 thoughtful and informative discussions. The contents of this article are solely the responsibility of the authors  
603 and do not necessarily reflect the official views of the National Institutes of Health, the Centers for Disease  
604 Control and Prevention, the U.S. Department of Veterans Affairs, or the United States government.

605 We have no competing interest to declare.

606

607 **FUNDING INFORMATION**

608 This work was supported by NIH grant R37AI21150-33 (W.M.S) and funds from an Intergovernmental  
609 Personnel Act from the CDC to C.E.R-L., J.L.R. and W.M.S. W.M.S. is the recipient of a Senior Research  
610 Career Scientist Award from the Biomedical Laboratory Research and Development Service of the U.S.  
611 Department of Veterans Affairs. CDC-based coauthors were funded by CDC. Their work was in part made  
612 possible through support from CDC's Advanced Molecular Detection (AMD-18) and Combating Antibiotic  
613 Resistant Bacteria (CARB) programs.

614

615 **Figures and Legends**

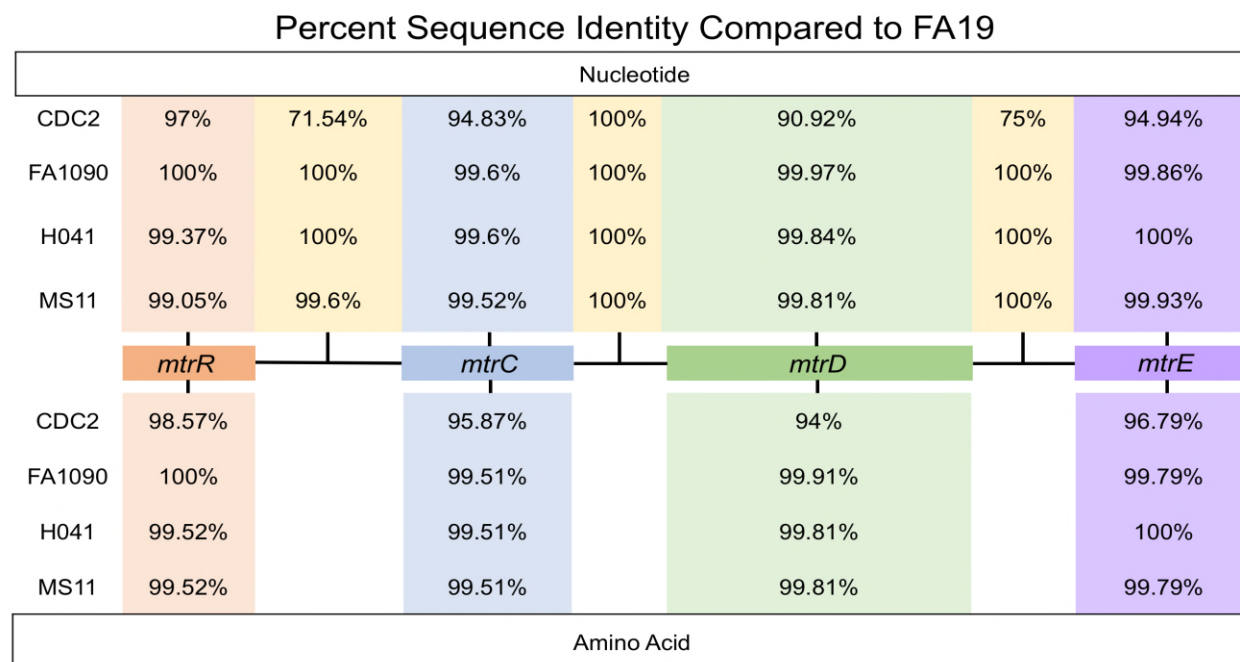

616

617

618

619

620

621

622

623

624

625

626

**Figure 1.** Shown are the nucleotide and amino acid sequence percent identities of genes and intervening regions of the *mtr* locus possessed by gonococcal strains with respect to FA19 (CP012026.1). Accession numbers are provided in Table S1. Clustal Omega multiple sequence alignments were performed using *N. gonorrhoeae* strains FA19, CDC2, FA1090, H041, and MS11. Alignments were generated for each *mtr* gene using their nucleotide and amino acid sequences, and nucleotide sequences were aligned for the intergenic regions. Pairwise identity matrices were calculated, and the pairwise identity values for each alignment are shown.

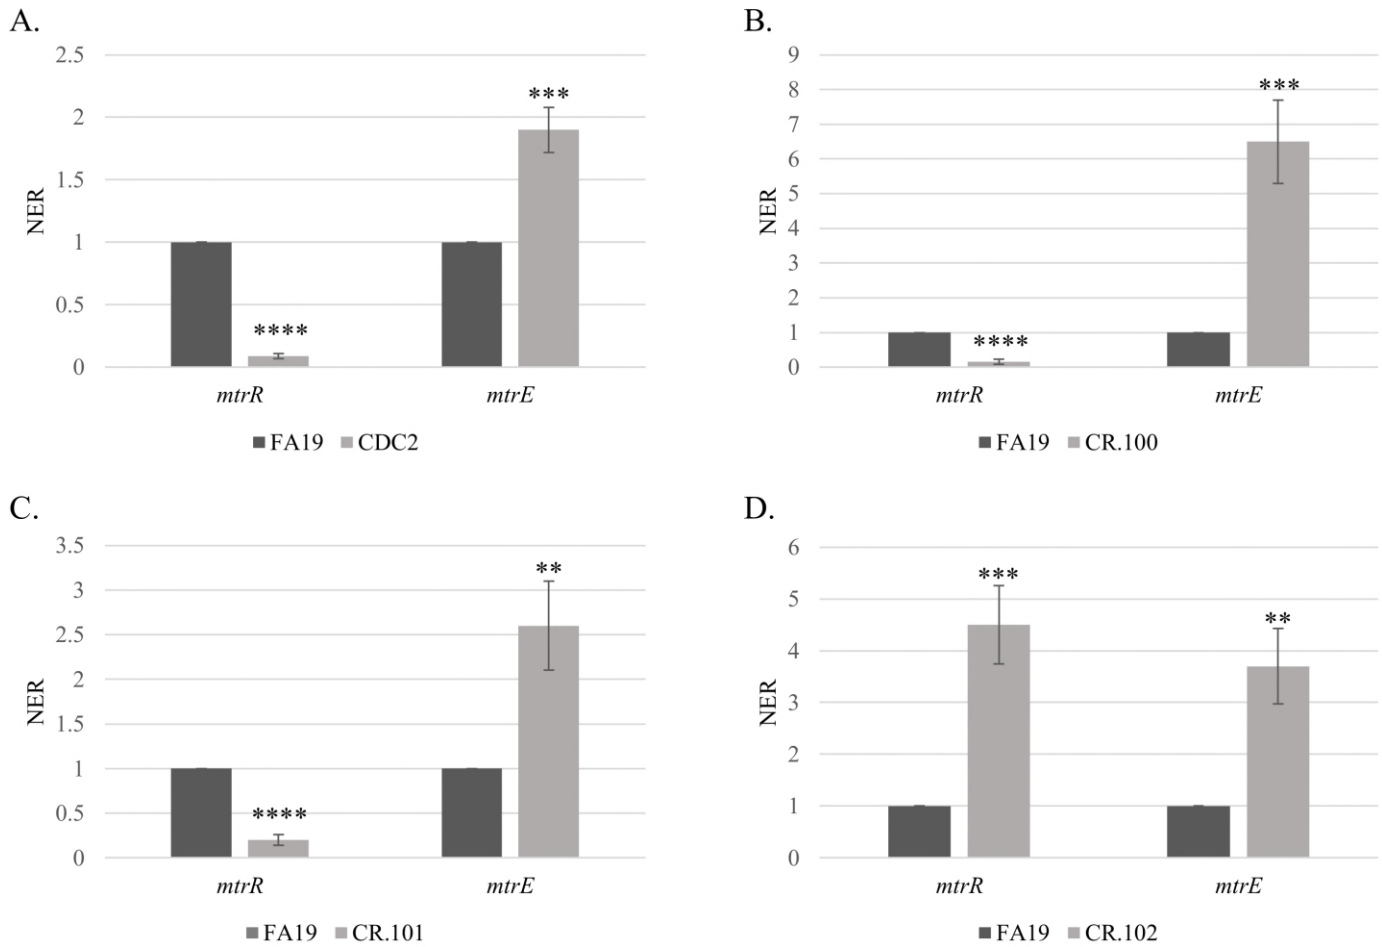

Fig 2.

627

628

629

630

631

632

633

**Figure 2.** Shown are levels of expression of *mtrR* and *mtrE* genes in gonococcal strains FA19 and CDC2 (A), FA19 and CR.100 (B), FA19 and CR.101 (C) and FA19 and CR.102 (D). Gene transcript levels were quantified by qRT-PCR performed in triplicate with three biological replicates. Results are presented as average NER (normalized expression ratio) values ( $\pm$ SD) with P values. \*\* =  $P \leq 0.01$ ; \*\*\* =  $P \leq 0.001$ ; \*\*\*\* =  $P \leq 0.0001$

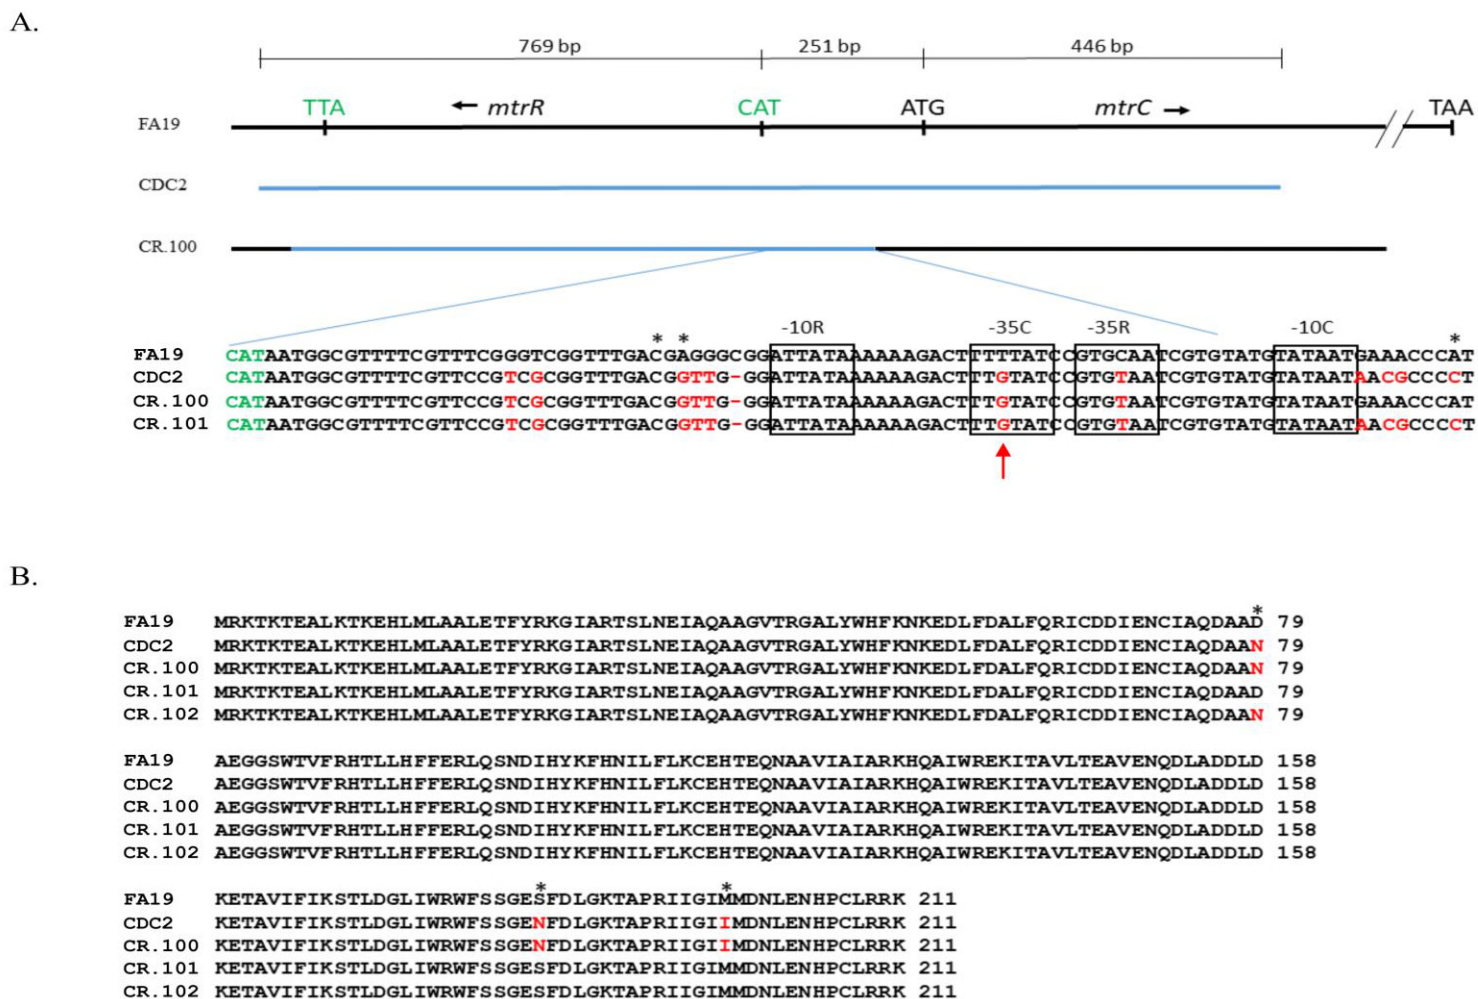

Fig 3

634  
 635 **Figure 3.** (A) Shown is the region of the *mtrR-mtrC* that was PCR-amplified from chromosomal DNA of strain  
 636 CDC2 (blue line) used to transform strain FA19. The region of recombination in transformant strain CR.100 is  
 637 shown by the blue line. The nucleotide sequences of the *mtrR/mtrC* promoter region (*mtrCDE* coding strand)  
 638 from strains FA19, CDC2, CR.100 and CR.101 are shown below. The translation start codon for *mtrR* is shown  
 639 in green. The -10 and -35 hexamers of the *mtrR* and *mtrCDE* promoters are boxed. The TSS sites for both  
 640 promoters are shown by asterisks. The red arrow shows the point mutation in the -35 hexamer of the *mtrCDE*  
 641 sigma-70 promoter. Differences in nucleotide sequence or deletions are highlighted in red. (B) The predicted  
 642 amino acid sequences of MtrR produced by strains FA19, CDC2, CR.100, CR.101 and CR.102 are shown.  
 643 Differences at sites 79, 183 and 197 are highlighted in red and with asterisks.



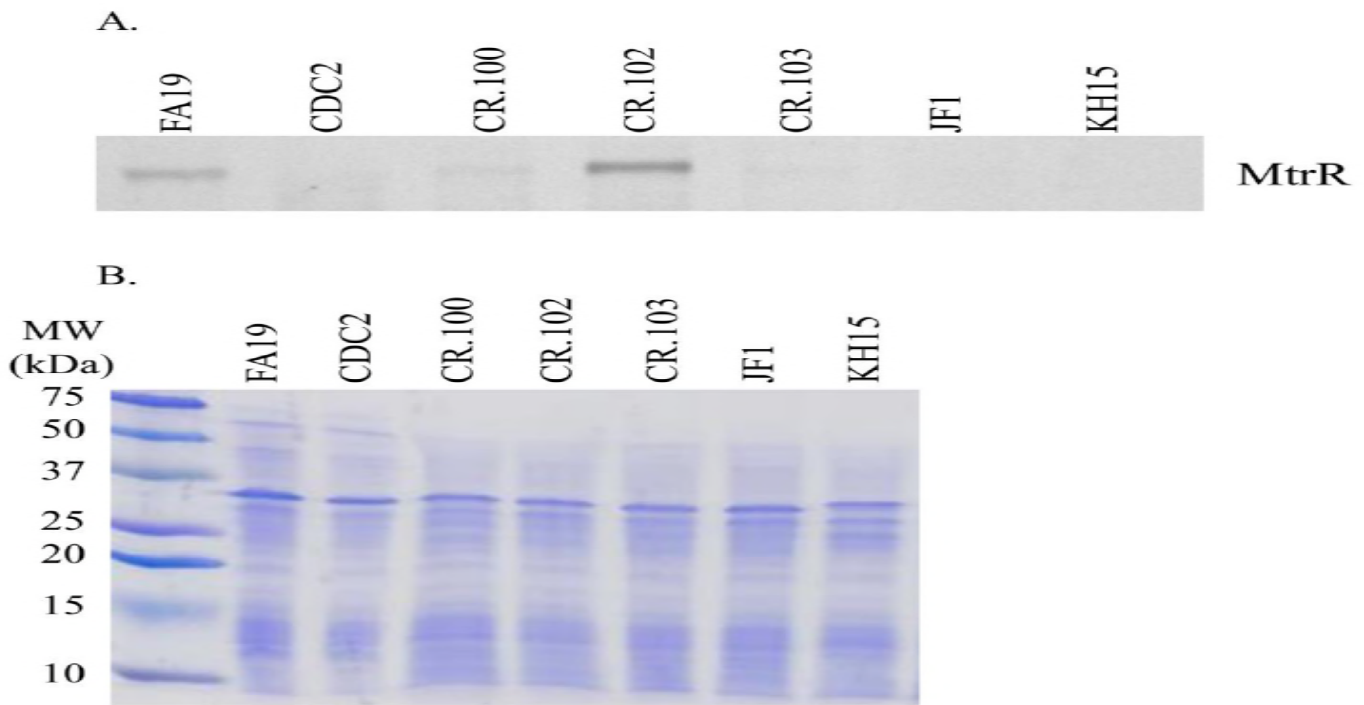

Fig 4.

645

646

647

648

649

650

**Figure 4.** (A) Shown are levels of MtrR repressor protein in whole cell lysates of gonococcal strains as determined by western immunoblotting. (B) The SDS-PAGE gel stained with CBB showing near equivalent levels of protein (15 micrograms) loaded in each well is shown. Gonococcal strains are identified at the top of each well.

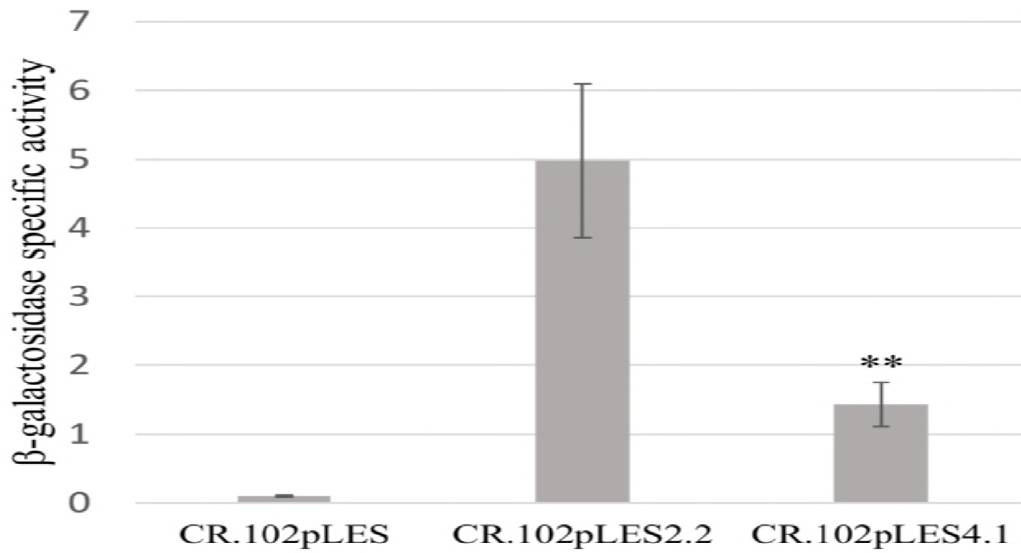

Fig 5.

651

652

653

654

655

656

657

**Figure 5.** Shown are specific activities of  $\beta$ -gal produced by gonococcal strain CR.102 (MtrR D79N) from pLES94 constructs without  $P_{mtrC-lacZ}$  (CR.102pLES; control), or with  $P_{mtrC-lacZ}$  with the CDC2 promoter (CR.102pLES2.2) or the same but with the WT -35 hexamer possessed by FA19 (CR.102pLES4.1). The results are shown as average values ( $\pm$ SD) with P values from three biologic replicates with each performed in triplicate. \*\* =  $P \leq 0.01$

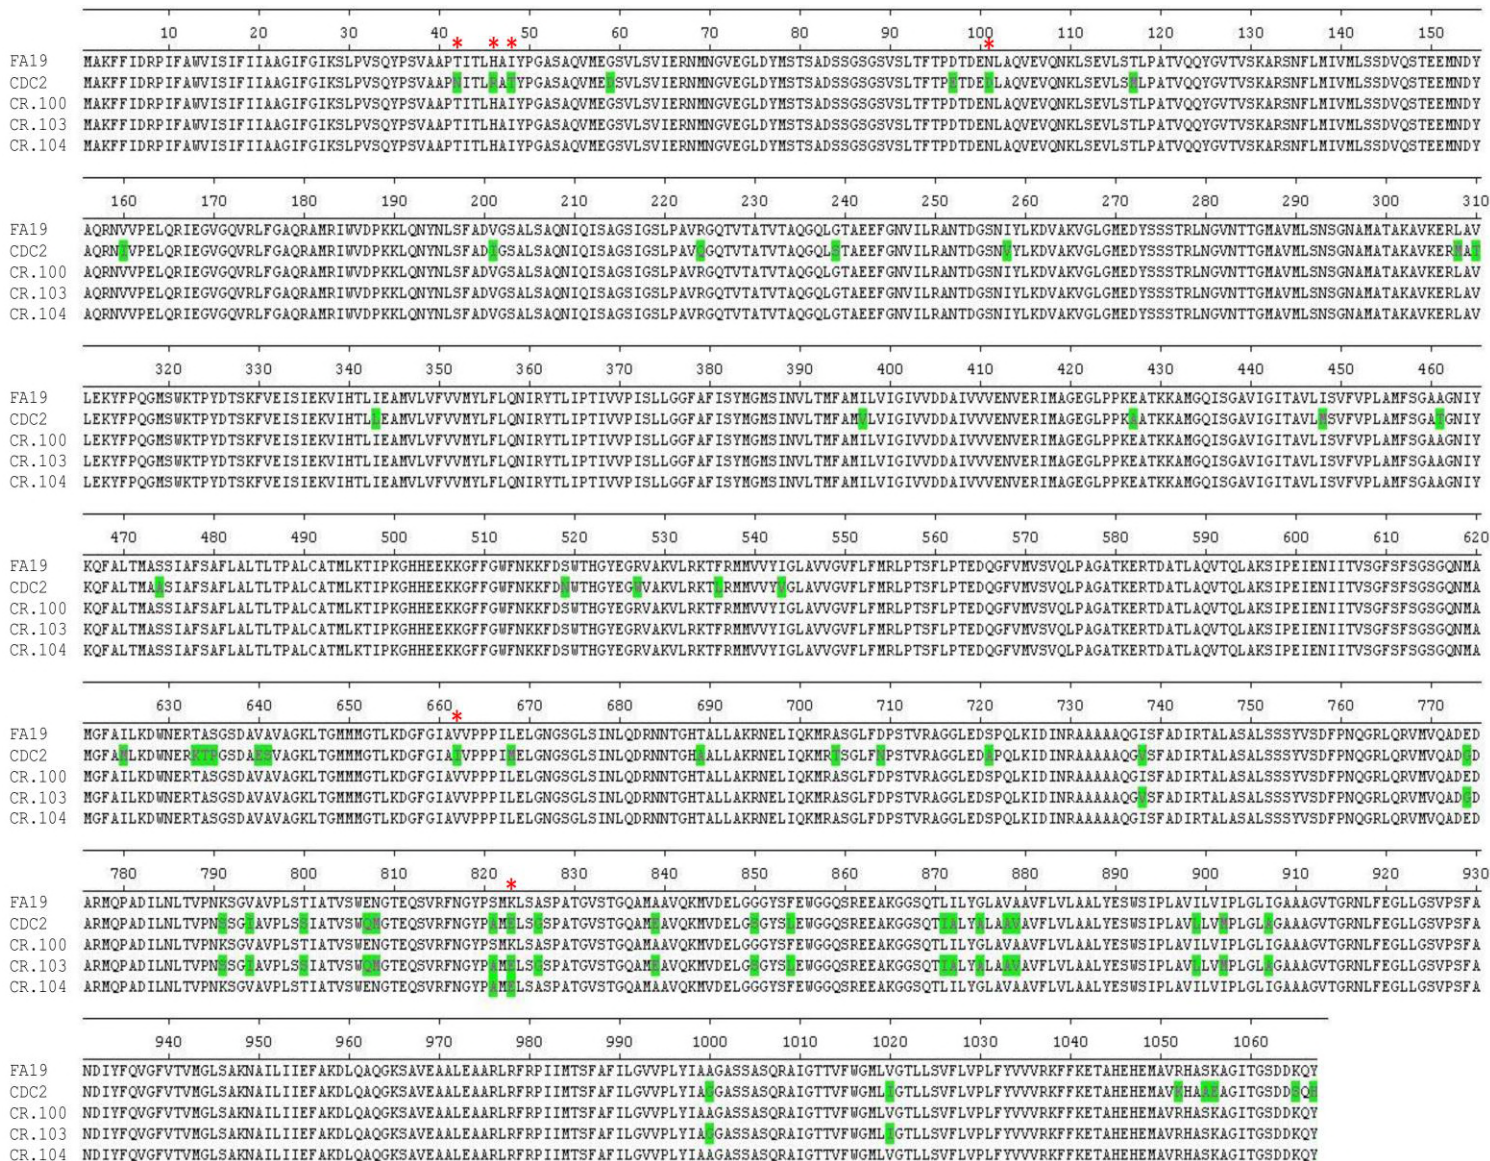

658 Fig 6  
 659 **Figure 6.** Shown are the sequences of the MtrD protein produced by gonococcal strains as deduced by DNA  
 660 sequencing. Amino acid differences of MtrD from strains CDC2, CR.100, CR.103 and CR.104 compared to the  
 661 FA19 are shown in green, with amino acids predicted to be sites for binding antimicrobials shown by red  
 662 asterisks.

664 **Table 1.** Levels of Antimicrobial Susceptibility of Gonococcal Strains

665

666 **MIC ( $\mu\text{g/ml}$ )<sup>1</sup>**

667

| 668 <b>Strain</b>        | 668 <b>Azi</b> | 668 <b>Ery</b> | 668 <b>TX-100</b> | 668 <b>CV</b> | 668 <b>EB</b> |
|--------------------------|----------------|----------------|-------------------|---------------|---------------|
| 670 FA19                 | 0.25           | 0.25           | 100               | 1.25          | 1             |
| 672 KH14                 | 0.0625         | 0.0625         | 12.5              | 0.625         | 0.25          |
| 674 JF1                  | 0.5            | 1              | 200               | 1.25          | 2             |
| 676 KH15                 | 1              | 2              | >6,400            | 2.5           | 4             |
| 678 CDC2                 | 2              | 4              | >6,400            | 2.5           | 16            |
| 680 <i>CDC2mtrD::kan</i> | <0.03          | 0.125          | $\leq 50$         | 0.625         | 0.5           |
| 682 <i>CDC2norM::kan</i> | 2              | 4              | >6,400            | 2.5           | 4             |
| 684 <i>CDC2macA::kan</i> | 2              | 4              | >6,400            | 2.5           | 16            |
| 686 CR.100               | 1              | 2              | >6,400            | 2.5           | 4             |
| 688 CR.101               | 1              | 2              | >6,400            | 2.5           | 4             |
| 690 CR.102               | 0.5            | 1              | 200               | 2.5           | 2             |
| 692 CR.103               | 2              | 4              | >6,400            | 2.5           | 8             |
| 694 CR.104               | 2              | 4              | >6,400            | 5             | 8             |

695

696

697 <sup>1</sup> All MIC values are representative results from 3-5 independent determinations

698

699 **Table 2. Summary of important *mtr* genetic changes and Azi and TX-100 MIC values**

| 700                 | 701                   | 702                                             | 703                   | 704  | 705    | 706 |
|---------------------|-----------------------|-------------------------------------------------|-----------------------|------|--------|-----|
| 707                 | 708                   | 709                                             | 710                   | 711  | 712    | 713 |
| Strain              | MtrR                  | <i>mtrCDE</i> promoter/<br><i>mtrR</i> promoter | MtrD                  | Azi  | TX-100 |     |
| 704                 | 705                   | 706                                             | 707                   | 708  | 709    | 710 |
| CDC2                | D79N, S183N,<br>M197I | -35 (T to G)/<br>-35 (C to T)                   | mosaic-like           | 2    | >6,400 |     |
| 707                 | 708                   | 709                                             | 710                   | 711  | 712    | 713 |
| FA19                | WT                    | WT/WT                                           | WT                    | 0.25 | 100    |     |
| 709                 | 710                   | 711                                             | 712                   | 713  | 714    | 715 |
| CR.100 <sup>1</sup> | D79N, S183N,<br>M197I | -35 (T to G)/<br>-35 (C to T)                   | WT                    | 1    | >6,400 |     |
| 712                 | 713                   | 714                                             | 715                   | 716  | 717    | 718 |
| CR.101              | WT                    | -35 (T to G)/<br>-35 (C to T)                   | WT                    | 1    | >6,400 |     |
| 715                 | 716                   | 717                                             | 718                   | 719  | 720    | 721 |
| CR.102              | D79N                  | WT/WT                                           | WT                    | 0.5  | 200    |     |
| 717                 | 718                   | 719                                             | 720                   | 721  | 722    | 723 |
| CR.103              | D79N, S183N,<br>M197I | -35 (T to G)/<br>-35 (C to T)                   | 3'-end<br>mosaic-like | 2    | >6,400 |     |
| 720                 | 721                   | 722                                             | 723                   | 724  | 725    | 726 |
| CR.104              | D79N, S183N,<br>M197I | -35 (T to G)/<br>-35 (C to T)                   | S821A,<br>K823E       | 2    | >6,400 |     |

724 <sup>1</sup> Strains CR.100-104 are all in the FA19 genetic background

725  
726

727

728 **Supplemental Tables, Figures and Legends**

729 **Table S1. Gonococcal clinical strains and *mtrD::kan* mutants used in this study**

| 730 | <b>Strain designation</b>      | <b>LRRB<sup>1</sup> designation</b> | <b>SRA Accession #<sup>2</sup></b> | <b>Azi MIC (µg/ml)</b> |
|-----|--------------------------------|-------------------------------------|------------------------------------|------------------------|
| 731 | CDC1                           | GS0001                              | SRR4416029                         | 2                      |
| 732 | CDC1 <i>mtrD::kan</i>          |                                     |                                    | <0.03                  |
| 733 | CDC2                           | GS0002                              | SRR4416030                         | 2                      |
| 734 | CR.99 (CDC2 <i>mtrD::kan</i> ) |                                     |                                    | <0.03                  |
| 735 | CDC5                           | GS0005                              | SRR4416060                         | 2                      |
| 736 | CDC5 <i>mtrD::kan</i>          |                                     |                                    | <0.03                  |
| 737 | CDC7                           | GS0007                              | SRR4416062                         | 2                      |
| 738 | CDC7 <i>mtrD::kan</i>          |                                     |                                    | 0.06                   |
| 739 | CDC13                          | GS0013                              | SRR4416033                         | 2                      |
| 740 | CDC13 <i>mtrD::kan</i>         |                                     |                                    | 0.06                   |
| 741 | CDC17                          | GS0017                              | SRR4416037                         | 2                      |
| 742 | CDC17 <i>mtrD::kan</i>         |                                     |                                    | <0.03                  |
| 743 | CDC27                          | GS0027                              | SRR4416048                         | 2                      |
| 744 | CDC27 <i>mtrD::kan</i>         |                                     |                                    | <0.03                  |
| 745 | CDC37                          | GS0037                              | SRR4416059                         | 2                      |
| 746 | CDC37 <i>mtrD::kan</i>         |                                     |                                    | <0.03                  |

747 <sup>1</sup>LRRB: Laboratory Reference and Research Branch

748 <sup>2</sup>SRA: Sequence read archive

749



750 **Table S2. Genetic derivatives used in this study**

| 751 | <b>Strain</b>         | <b>Genotype</b>                                          | <b>Source</b> |
|-----|-----------------------|----------------------------------------------------------|---------------|
| 752 | FA19Str <sup>R</sup>  | point mutation in <i>rpsL</i>                            | Jerse, 2003   |
| 753 | JF1                   | as FA19 with <i>mtrR</i> deleted                         | Hagman 1995   |
| 754 |                       |                                                          | Folster 2005  |
| 755 | KH14                  | as FA19 but with <i>mtrD::kan</i>                        | Hagman 1997   |
| 756 | KH15                  | as FA19 with 1 bp deletion in the                        |               |
| 757 |                       | <i>mtrR</i> promoter                                     | Hagman 1995   |
| 758 | CR.99                 | as CDC2 but with <i>mtrD::kan</i>                        | this study    |
| 759 | CR.100                | as FA19Str <sup>R</sup> with <i>mtrR</i> gene from       |               |
| 760 |                       | CDC2 and <i>mtrC</i> and <i>mtrR</i> promoters           |               |
| 761 |                       | from CDC2                                                | this study    |
| 762 | CR.101                | as FA19Str <sup>R</sup> with <i>mtrR/mtrC</i> intergenic |               |
| 763 |                       | region from CDC2                                         | this study    |
| 764 | CR.102                | as FA19Str <sup>R</sup> with D79N mutation               |               |
| 765 |                       | in MtrR                                                  | this study    |
| 766 | CR.103                | as CR.100 with <i>mtrD</i> mutations                     |               |
| 767 |                       | (positions 2196 to 3072) from CDC2                       | this study    |
| 768 | CR.104                | as CR.100 with K823E mutation in MtrD                    | this study    |
| 769 | FA19 <i>norM::kan</i> | as FA19 with <i>norM::kan</i>                            | Rouquette-    |
| 770 |                       |                                                          | Loughlin 2003 |
| 771 | FA19 <i>macA::kan</i> | as FA19 with <i>macA::kan</i>                            | this study    |
| 772 | CR102 pLES94,         | control plasmid                                          | this study    |
| 773 | CR102 pLES2.2         | with <i>pmtrC-lacZ</i> CDC2 promoter                     | this study    |
| 774 | CR.102 pLES4.1        | with <i>pmtrC-lacZ</i> CDC2 promoter with G to T change  | this study    |

775



776 **Table S3. Sequences of oligonucleotide primers**

| 777 | Primer      | Sequence                        | Use                                   |
|-----|-------------|---------------------------------|---------------------------------------|
| 779 | macAF       | 5'-GGATGGTCTTATCTGAAGCC-3'      | construction of CDC2 <i>macA::kan</i> |
| 780 | macAR       | 5'-CATCAGCGTGGACTTGCCC-3'       | construction of CDC2 <i>macA::kan</i> |
| 781 | CEL1        | 3'-GACAATGTCATGCGATGATAGG-5'    | construction of CR.100, CR.102        |
| 782 | KH9#12B     | 3'-CTCTTGTTTACTGATGGCATCG-5'    | construction of CR.100                |
| 783 | KH9#10B     | 5'-CCAAAACCGAAGCCTTGAAAACCAA-3' | construction of CR.102                |
| 784 | mtrD11Rev   | 5'-CAGGCTGCATACGGGCATC-3'       | construction of CR.103                |
| 785 | mtrD3       | 5'-GGTTCATCGGTTGCTTCCC-3'       | construction of CR.103                |
| 786 | mtrD3Rev    | 5'-GGGAAGCGAACCGATGGAACC-3'     | construction of CR.103                |
| 787 | mtrD1       | 5'-CGGCATCTGAAGCCAAACCTGC-3'    | construction of CR.103                |
| 788 | mtrE12      | 5'-TGCGATGTCGATCAGCTTTTG-3'     | construction of CR.103, CR.104        |
| 789 | mtrD10      | 5'-AGCATCAACCTGCAAGACCGC-3'     | construction of CR.103, CR.104        |
| 790 | 16Smai_qRTF | 5'-CCATCGGTATTCTCCACATCTCT-3'   | qRT-PCR of 16S                        |
| 791 | 16Smai_qRTR | 5'-CGTAGGGTGCAGCGTTAATC-3'      | qRT-PCR of 16S                        |
| 792 | mtrEqPCR-F  | 5'-TGTCTGCCTGCACCATGATT-3'      | qRT-PCR of <i>mtrE</i>                |
| 793 | mtrEqPCR-R  | 5'-AGTGCATGTCGATCAGCTT-3'       | qRT-PCR of <i>mtrE</i>                |
| 794 | mtrR_qRT_F  | 5'-CTTGTTTGACGCGTTGTTCCA-3'     | qRT-PCR of <i>mtrR</i>                |
| 795 | mtrR_qRT_R  | 5'-GTGGATGTCGTTGCTTTGCA-3'      | qRT-PCR of <i>mtrR</i>                |
| 796 | C2          | 5'-CGGGATCCCGTATAAAAAAGACTTT    | construction of pLES2.2               |
| 797 |             | GTATCCGTGTAATCG-3'              |                                       |
| 798 | C3PmtrC     | 5'-CGGGATCCCGAGCCATTATCTATCCT   | construction of pLES2.2 and           |
| 799 |             | ATCTG-3'                        | pLES4.1                               |
| 800 | C4          | 5'-CGGGATCCCGTATAAAAAAGACTTTT   | construction of pLES4.1               |
| 801 |             | TATCCGTGTAATCG-3'               |                                       |
| 802 | PEmtrC181   | 5'-CCTTAGAAGCATAAAAAAGCCTA-3'   | PE of <i>mtrC</i>                     |
| 803 | CEL4        | 5'-GCAATCCCTTTGCGGTAAAAGG-3'    | construction of CR.101                |
| 804 | mtrCpromR   | 5'-GTAGCGGAATCTTCGATTTTTTCGG-3' | construction of CR.101                |
| 805 | mtrD8       | 5'-GTCAGCGTGCAACTGCTGCG-3'      | qRT-PCR of <i>mtrD</i>                |
| 806 | mtrD13      | 5'-GCCCCGAAAAGCTGAAGCCGG-3'     | qRT-PCR of <i>mtrD</i>                |



808 **Figure S1.** (A) Shown is an alignment of the nucleotide sequences of the complete *mtr* locus possessed by  
809 gonococcal strains FA19, CDC2 and three clinical isolates studied by Wadsworth *et al.* (30). Nucleotides of  
810 note in CDC2 that differ from FA19 in either coding or non-coding regions are highlighted in red. The Correia  
811 element (CE) in strain GCGS0276 is highlighted in gray. (B) Shown is a phylogenetic tree for the *mtr* loci  
812 possessed by gonococcal strains FA19, CDC2, GCGS0276, GCGS0402 and GCGS0834.

813

A.

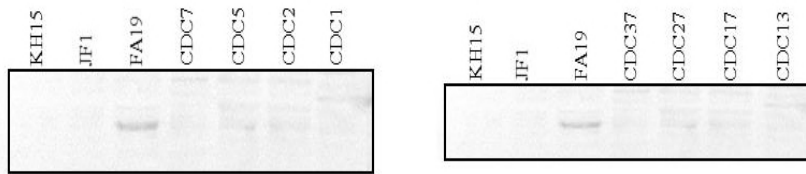

B.

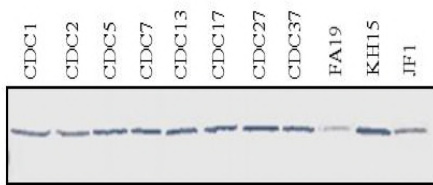

C.

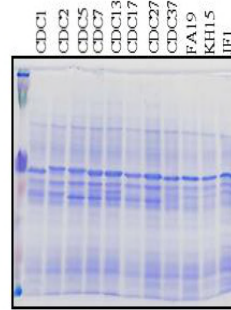

Fig S2.

814

815 **Figure S2.** Shown are levels of the MtrR (A) and MtrE (B) proteins in whole cell lysates of gonococcal strains

816 as determined by western immunoblotting. The eight CDC alert strains are shown with a strain number.

817 Included in these blots are lysates from WT strain FA19 and transformant strains JF1 and KH15 that lack MtrR

818 due to deletion of the gene (JF1) or a single bp deletion in the *mtrR* promoter that abrogates *mtrR* gene

819 expression and elevates *mtrCDE* expression. An accompanying CBB-stained gel is shown panel C.

820

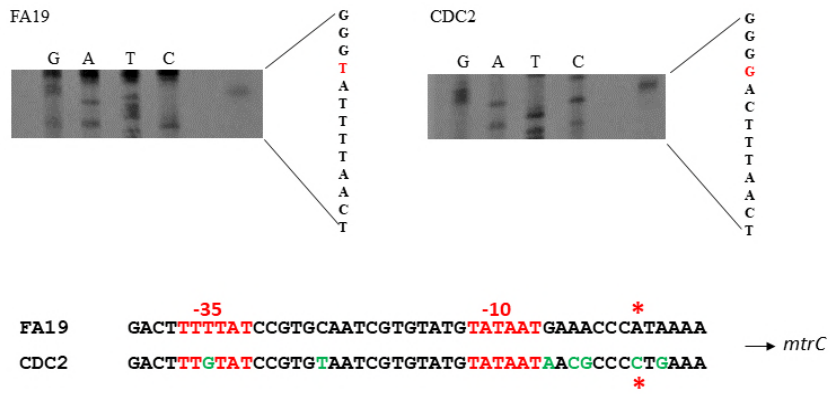

Fig S3.

821

822

823

824

825

826

827

**Figure S3.** (A). Shown are results from a primer extension experiment that identified the *mtrC* TSS in gonococcal strains FA19 and CDC2. The nucleotide sequence from the noncoding strand is shown adjacent to autoradiogram with the start sites highlighted in red. (B). Shown are the nucleotide sequences of the *mtrCDE* promoter region from strains FA19 and CDC2 with the G nucleotide change (CDC2) in the -35 hexamer shown in green and the TSS sites highlighted by red asterisks.

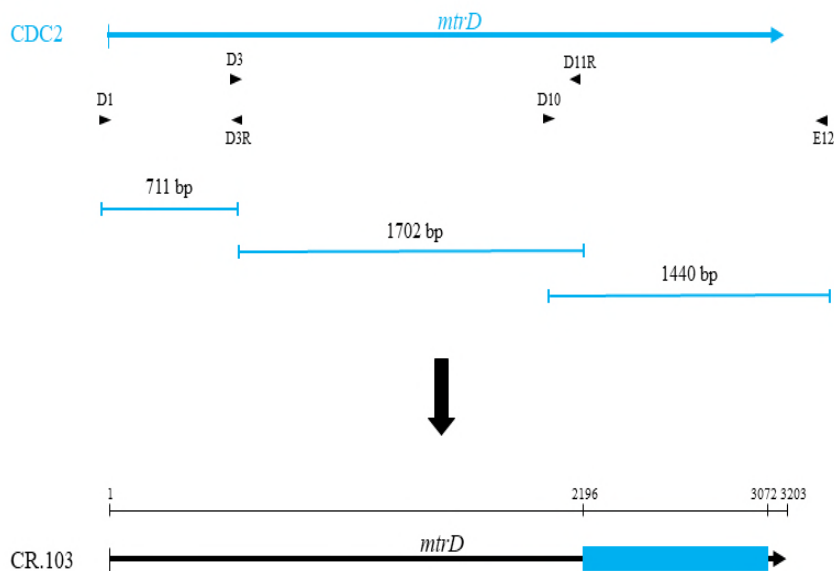

Fig S4.

828

829 **Figure S4.** Shown is the strategy used to construct CR.103. Three regions of *mtrD* from CDC2 were amplified  
830 by PCR. The oligonucleotide primers and the length of the products are shown. These PCR products were used  
831 to transform strain CR.100 for resistance to 1  $\mu\text{g/ml}$  of Azi. The region of recombination in strain CR.103 is  
832 shown by the blue rectangle.

### Percent Sequence Identity Compared to FA19

| Nucleotide |             |        |             |      |             |      |             |
|------------|-------------|--------|-------------|------|-------------|------|-------------|
| CDC2       | 97%         | 71.54% | 94.83%      | 100% | 90.92%      | 75%  | 94.94%      |
| FA1090     | 100%        | 100%   | 99.6%       | 100% | 99.97%      | 100% | 99.86%      |
| H041       | 99.37%      | 100%   | 99.6%       | 100% | 99.84%      | 100% | 100%        |
| MS11       | 99.05%      | 99.6%  | 99.52%      | 100% | 99.81%      | 100% | 99.93%      |
|            | <i>mtrR</i> |        | <i>mtrC</i> |      | <i>mtrD</i> |      | <i>mtrE</i> |
| CDC2       | 98.57%      |        | 95.87%      |      | 94%         |      | 96.79%      |
| FA1090     | 100%        |        | 99.51%      |      | 99.91%      |      | 99.79%      |
| H041       | 99.52%      |        | 99.51%      |      | 99.81%      |      | 100%        |
| MS11       | 99.52%      |        | 99.51%      |      | 99.81%      |      | 99.79%      |
| Amino Acid |             |        |             |      |             |      |             |



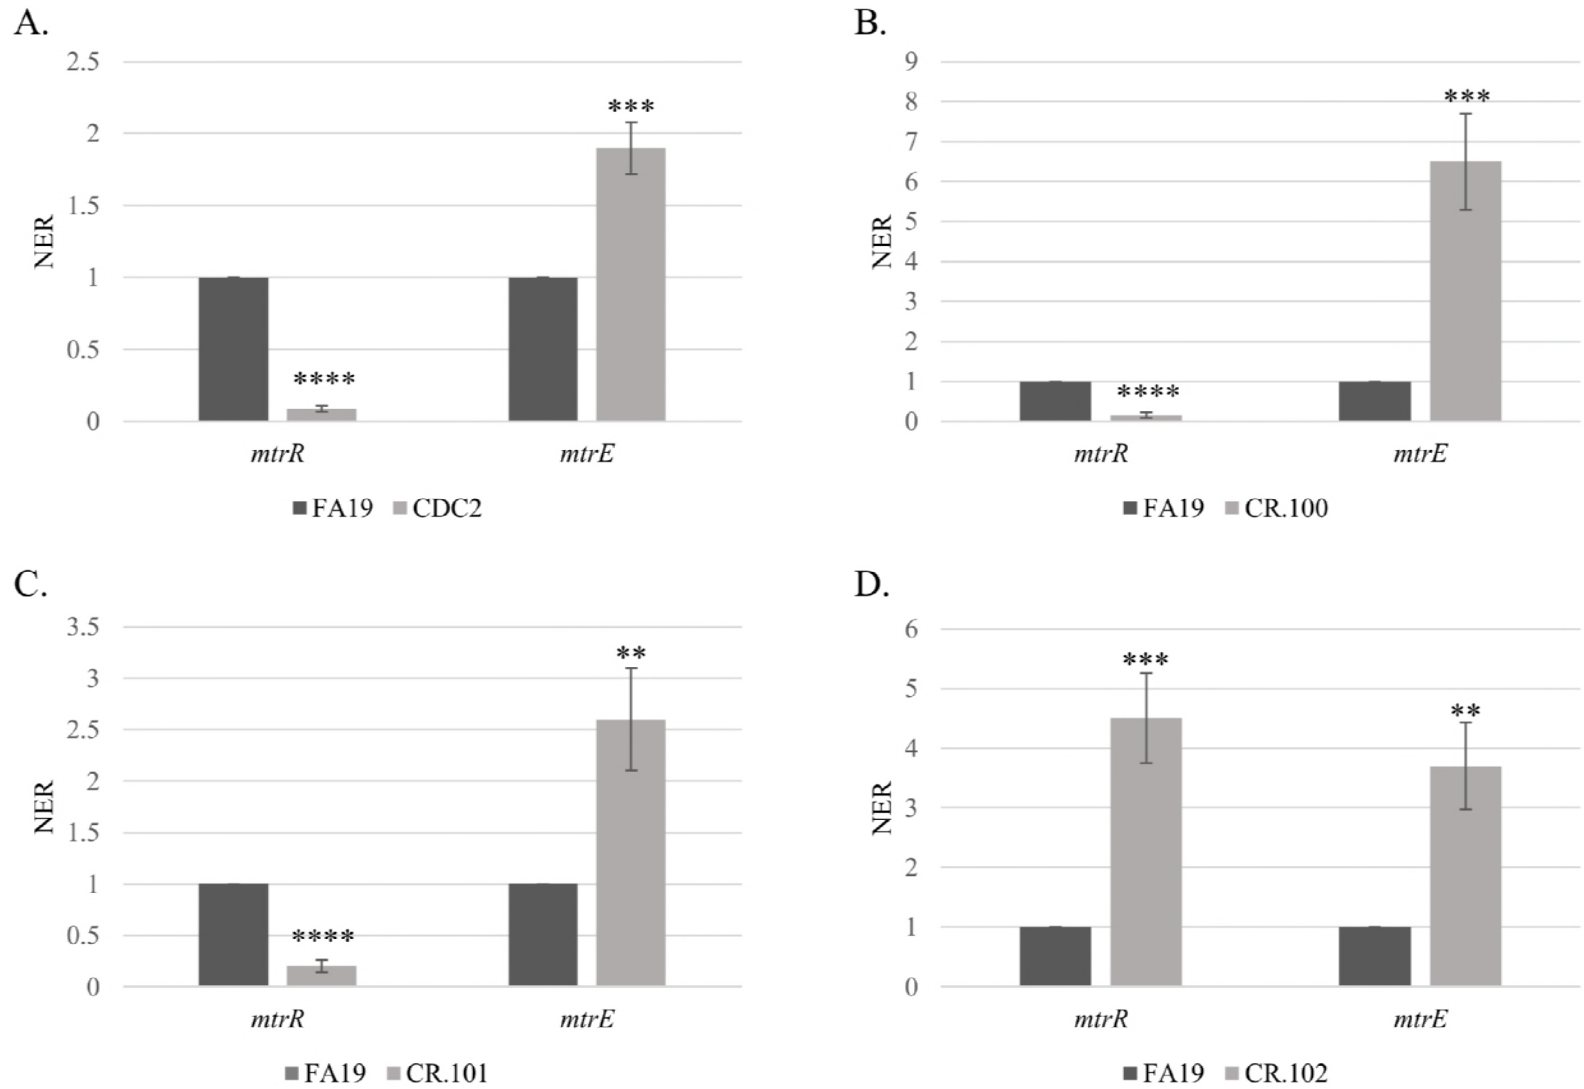

Fig 2.

A.

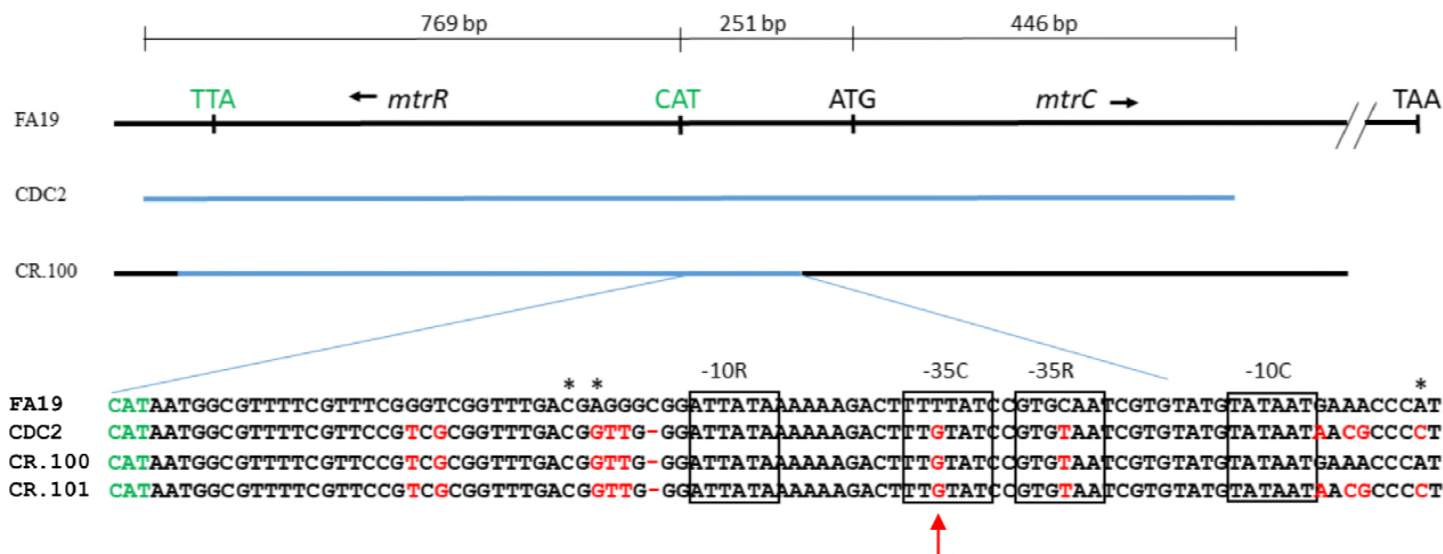

B.

FA19      MRKTKTEALKTKEHLMMLAALETFYRKG IARTSLNEIAQAAGVTRGALYWVFNKEDLFDALFQRICDDIENCIAQDAAD\* 79

CDC2      MRKTKTEALKTKEHLMMLAALETFYRKG IARTSLNEIAQAAGVTRGALYWVFNKEDLFDALFQRICDDIENCIAQDAAN 79

CR.100      MRKTKTEALKTKEHLMMLAALETFYRKG IARTSLNEIAQAAGVTRGALYWVFNKEDLFDALFQRICDDIENCIAQDAAN 79

CR.101      MRKTKTEALKTKEHLMMLAALETFYRKG IARTSLNEIAQAAGVTRGALYWVFNKEDLFDALFQRICDDIENCIAQDAAD 79

CR.102      MRKTKTEALKTKEHLMMLAALETFYRKG IARTSLNEIAQAAGVTRGALYWVFNKEDLFDALFQRICDDIENCIAQDAAN 79

  

FA19      AEGGSWTVFRHTLLHFFERLQSDIHYKFHNILFLKCEHTEQNAAVIAIARKHQAIWREKITAVLTEAVENQDLADDLD 158

CDC2      AEGGSWTVFRHTLLHFFERLQSDIHYKFHNILFLKCEHTEQNAAVIAIARKHQAIWREKITAVLTEAVENQDLADDLD 158

CR.100      AEGGSWTVFRHTLLHFFERLQSDIHYKFHNILFLKCEHTEQNAAVIAIARKHQAIWREKITAVLTEAVENQDLADDLD 158

CR.101      AEGGSWTVFRHTLLHFFERLQSDIHYKFHNILFLKCEHTEQNAAVIAIARKHQAIWREKITAVLTEAVENQDLADDLD 158

CR.102      AEGGSWTVFRHTLLHFFERLQSDIHYKFHNILFLKCEHTEQNAAVIAIARKHQAIWREKITAVLTEAVENQDLADDLD 158

  

FA19      KETAVIFIKSTLDGLIWRWFSSGES\*FDLGKTAPRIIGIMDNLENHPCLRRK 211

CDC2      KETAVIFIKSTLDGLIWRWFSSGENFDLGKTAPRIIGIMDNLENHPCLRRK 211

CR.100      KETAVIFIKSTLDGLIWRWFSSGENFDLGKTAPRIIGIMDNLENHPCLRRK 211

CR.101      KETAVIFIKSTLDGLIWRWFSSGESFDLGKTAPRIIGIMDNLENHPCLRRK 211

CR.102      KETAVIFIKSTLDGLIWRWFSSGESFDLGKTAPRIIGIMDNLENHPCLRRK 211

Fig 3

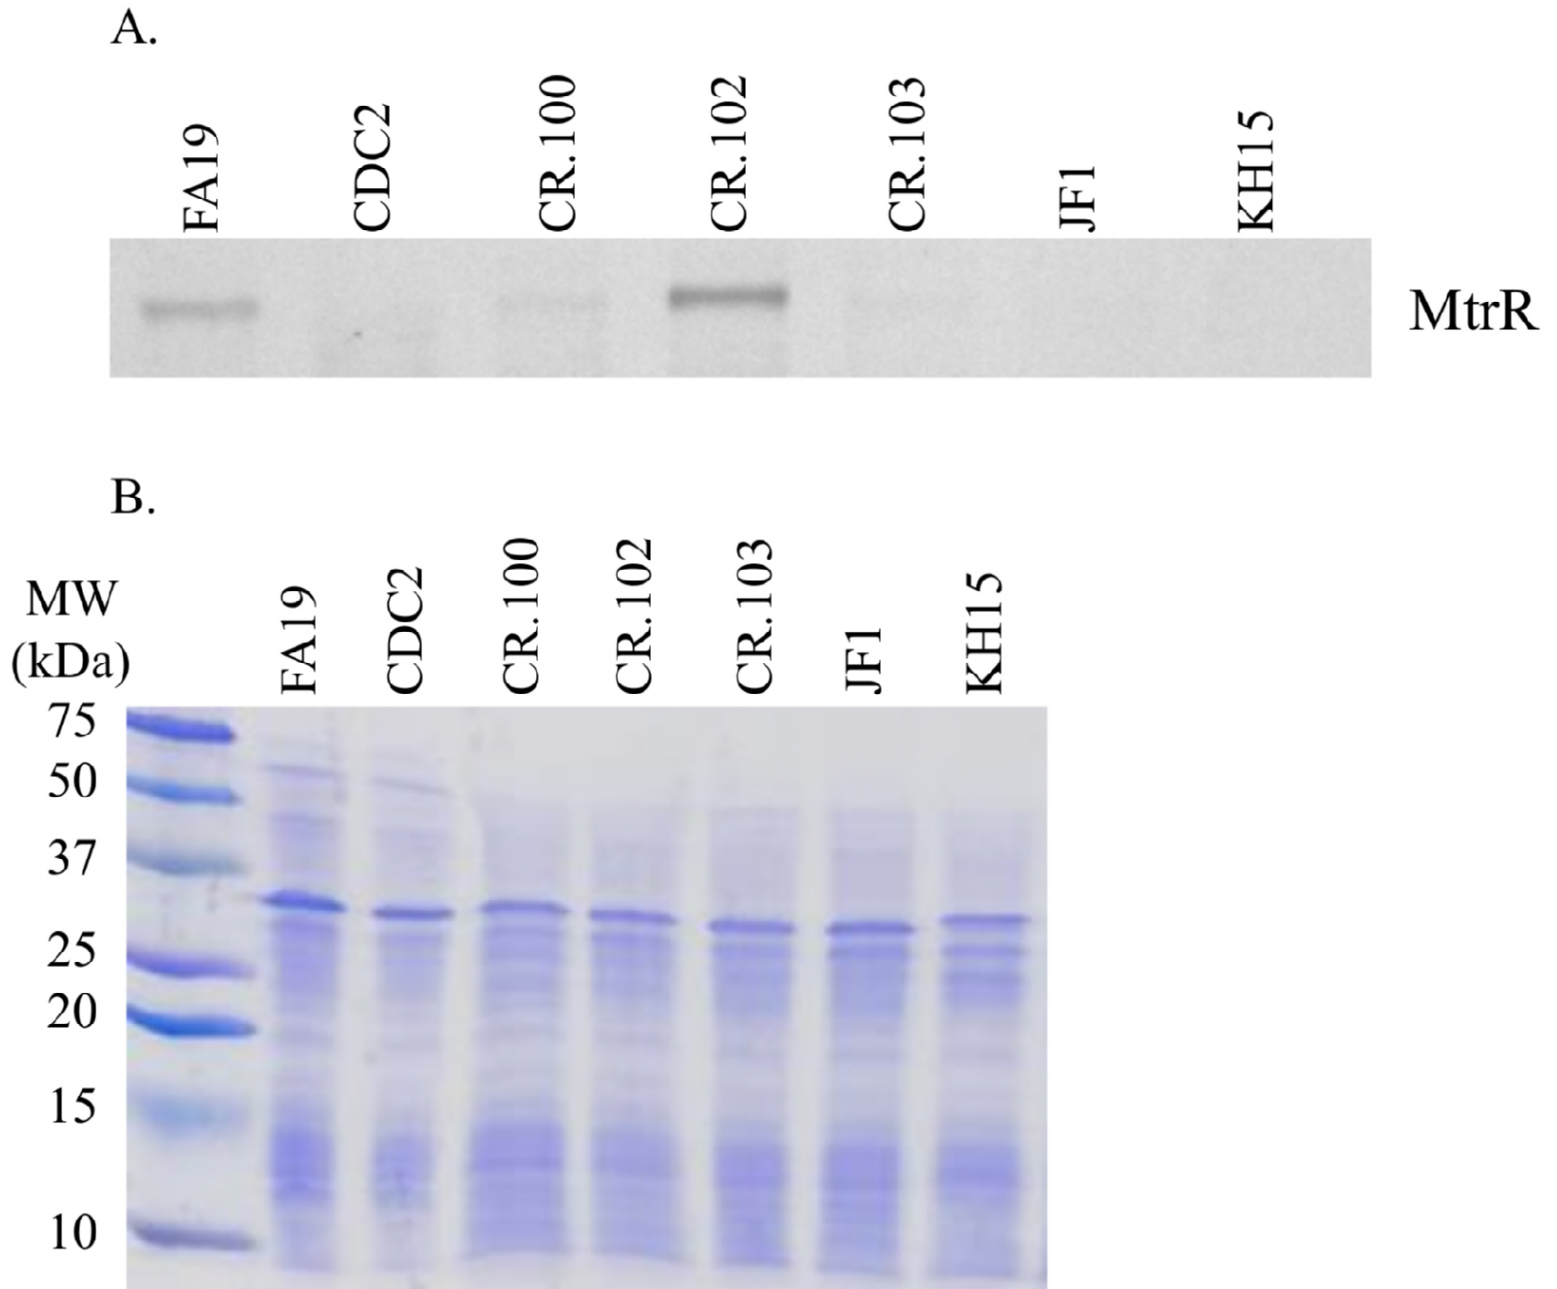

Fig 4.

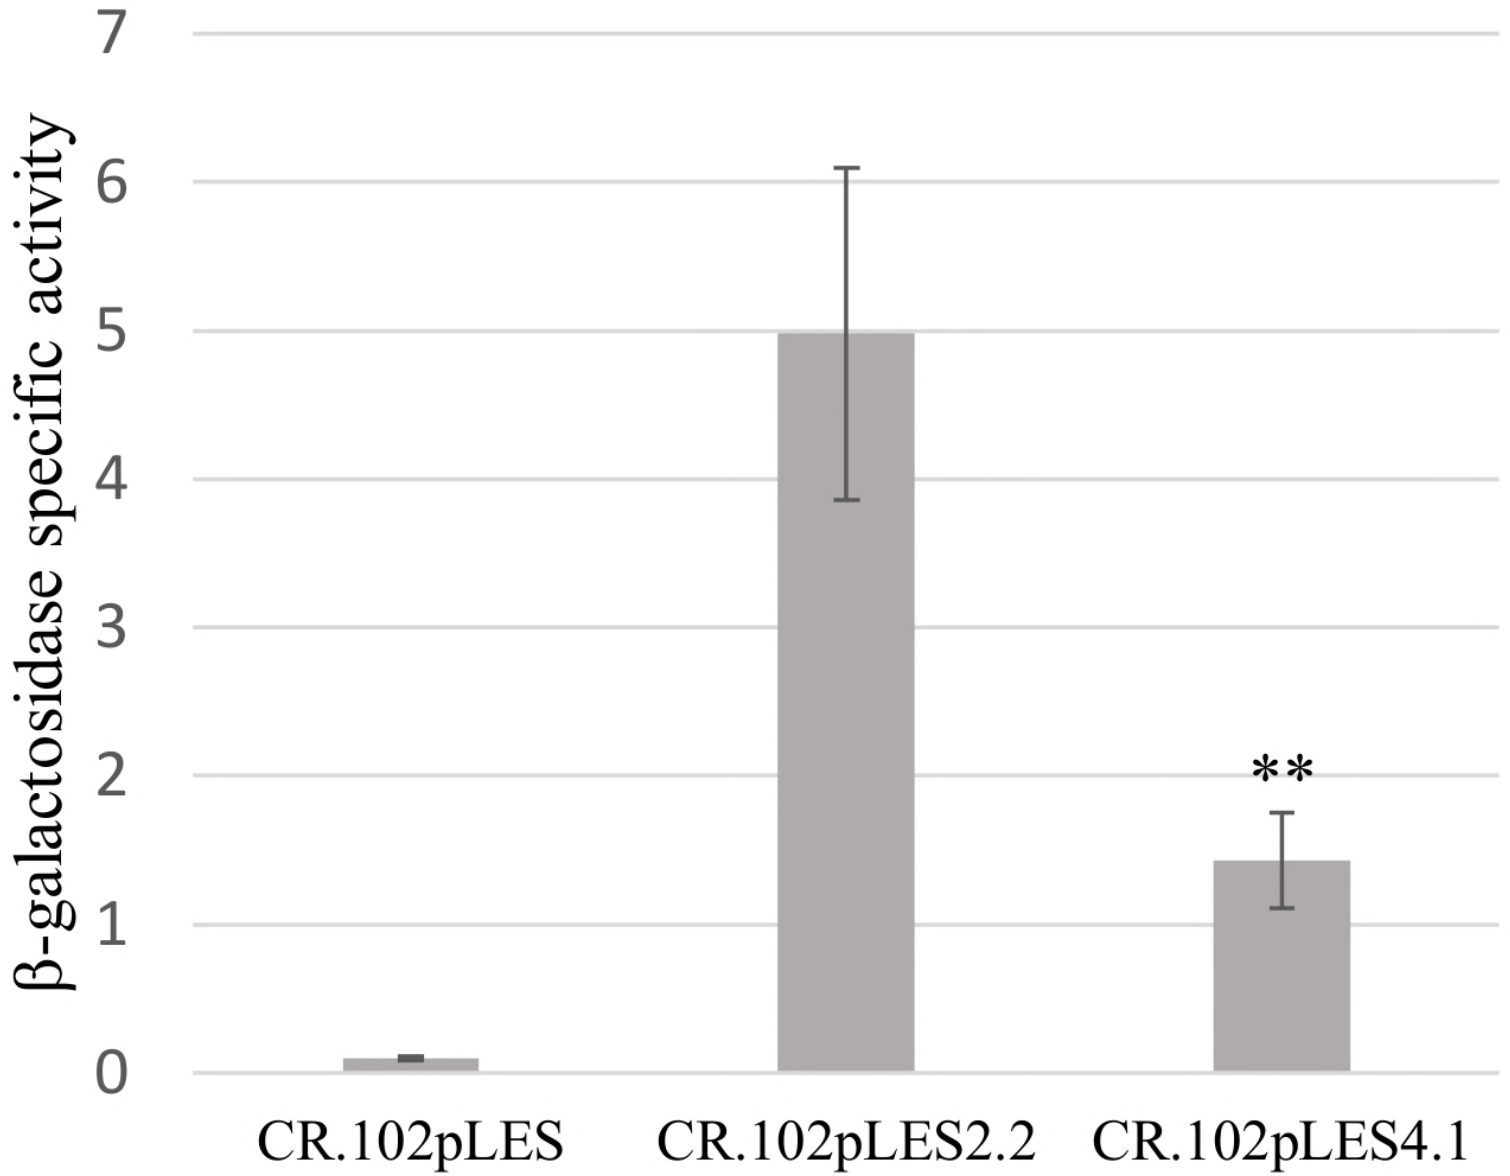

Fig 5.

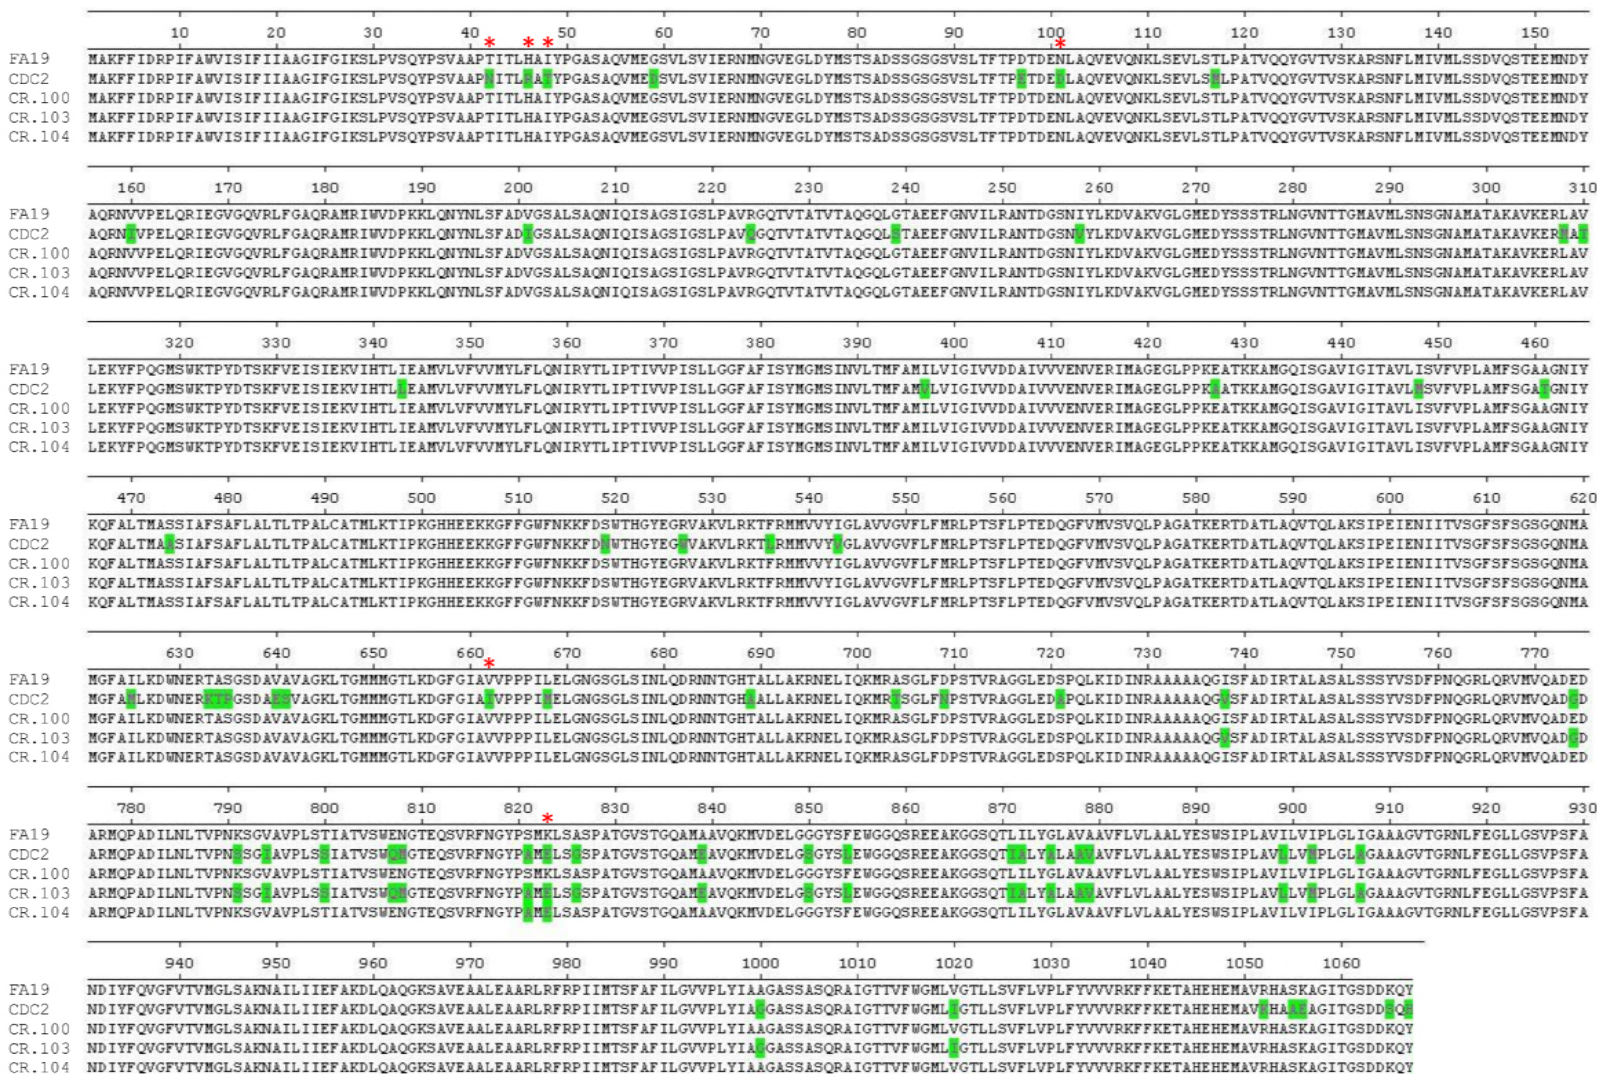

Fig 6
